# Supplementary material for: Copper catalysed [3 + 2] cycloaddition with concomitant annulation: formation of 2,4-diaryl-1,4-oxazepan-7-ones via a ketenimine route
Source: Royal Society of Chemistry journal article supplement (doi:10.1039/c4ra08008d), 2014-01-01
Supplement: c4ra08008d1.pdf [file c4ra08008d1.pdf]

## SUPPORTING INFORMATION

### **Copper catalysed [3+2] cycloaddition with concomitant annulation:**

### **Formation of 2,4-diaryl-1,4-oxazepan-7-ones *via* ketenimine route**

Selvam Kaladevi, Arumugam Thirupathi, Jeyaraman Sridhar, Shanmugam

Muthusubramanian\*

*Department of Organic Chemistry, School of Chemistry, Madurai Kamaraj University,  
Madurai - 625 021, India.*

*Email: [muthumanian2001@yahoo.com](mailto:muthumanian2001@yahoo.com)*

| <b>Table of Content</b>                                                                 | <b>Page No</b> |
|-----------------------------------------------------------------------------------------|----------------|
| Experimental section                                                                    | 2              |
| Analytical Data for compounds <b>3a-3l</b>                                              | 3              |
| Analytical Data for compounds <b>6a-6l</b>                                              | 5              |
| <sup>1</sup> H, <sup>13</sup> C NMR & Two Dimensional NMR spectra of compound <b>3d</b> | 9              |
| <sup>1</sup> H & <sup>13</sup> C NMR spectra of compound <b>6a</b>                      | 13             |
| <sup>1</sup> H & <sup>13</sup> C NMR spectra of compound <b>6b</b>                      | 14             |
| <sup>1</sup> H & <sup>13</sup> C NMR spectra of compound <b>6c</b>                      | 15             |
| <sup>1</sup> H, <sup>13</sup> C NMR & Two Dimensional NMR spectra of compound <b>6d</b> | 16             |
| <sup>1</sup> H & <sup>13</sup> C NMR spectra of compound <b>6e</b>                      | 20             |
| <sup>1</sup> H & <sup>13</sup> C NMR spectra of compound <b>6f</b>                      | 21             |
| <sup>1</sup> H & <sup>13</sup> C NMR spectra of compound <b>6g</b>                      | 22             |
| <sup>1</sup> H & <sup>13</sup> C NMR spectra of compound <b>6h</b>                      | 23             |
| <sup>1</sup> H & <sup>13</sup> C NMR spectra of compound <b>6i</b>                      | 24             |
| <sup>1</sup> H & <sup>13</sup> C NMR spectra of compound <b>6j</b>                      | 25             |
| <sup>1</sup> H, & <sup>13</sup> C NMR spectra of compound <b>6k</b>                     | 26             |
| <sup>1</sup> H & <sup>13</sup> C NMR spectra of compound <b>6l</b>                      | 27             |

## Experimental Section

### General

Nuclear Magnetic Resonance ( $^1\text{H}$  and  $^{13}\text{C}$  NMR) spectra were recorded on a Bruker 300 MHz NMR spectrometer in  $\text{CDCl}_3$  using TMS as internal standard. Chemical shifts are reported in parts per million ( $\delta$ ), coupling constants ( $J$  values) are reported in Hertz (Hz).  $^{13}\text{C}$  NMR spectra were routinely run with broadband decoupling. Melting points were determined on a melting point apparatus equipped with a thermometer and were uncorrected. Silica gel-G plates (Merck) were used for TLC analysis with a mixture of petroleum ether (60–80 °) and ethyl acetate as eluent. Elemental analyses were performed on a Perkin Elmer 2400 Series II Elemental CHNS analyzer.

**General procedure for the preparation of compound 3:** A mixture of reduced monophenacyl aniline (1 mmol) and potassium carbonate (1 mmol) in DMF (3 mL) was stirred well for 10 mins. Then propargyl bromide (2 mmol) was added and stirred for 2 h. After completion of the reaction (TLC), the mixture was poured into ice, extracted with ethyl acetate, concentrated under vacuum and the viscous liquid obtained was subjected for purification through column chromatography using petroleum ether/ethyl acetate mixture (9:1; v/v) as eluent to get the pure product.

**General procedure for the preparation of compound 6:** A mixture of alkyne 3 (1 mmol) and tosyl azide (1.2 mmol), copper (I) salt (10 mol %) and triethylamine (2 mmol) in dichloromethane (10 mL) at room temperature was vigorously stirred for 15-30 mins. After completion of the reaction (monitored by TLC), the mixture was washed with water (2 x 20 mL) and dried over sodium sulphate and concentrated under vacuum. Then the crude residue was subjected for purification through column chromatography using petroleum ether/ ethyl acetate mixture (9:1; v/v) as eluent to get the pure product.

## Analytical Data

### 1-Phenyl-2-(phenyl(prop-2-ynyl)amino)ethanol (3a)

Isolated as viscous liquid ;  $^1\text{H}$  NMR (300 MHz,  $\text{CDCl}_3$ )  $\delta_{\text{H}}$ : 2.25 (t, 1H,  $J = 2.4$  Hz, CH), 2.69 (s, 1H, OH), 3.44 (dd, 1H,  $J = 15.0, 9.3$  Hz,  $\text{CH}_2$ ), 3.65 (dd, 1H,  $J = 15.0, 3.6$  Hz,  $\text{CH}_2$ ), 4.00 - 4.16 (m, 2H,  $\text{CH}_2$ ), 5.01 - 5.03 (m, 1H, CH), 6.87 (t, 1H,  $J = 7.5$  Hz, Ar-H), 6.98 (d, 2H,  $J = 8.1$  Hz, Ar-H), 7.27 - 7.35 (m, 2H, Ar-H), 7.37 - 7.47 (m, 5H, Ar-H).  $^{13}\text{C}$  NMR (75 MHz,  $\text{CDCl}_3$ )  $\delta_{\text{C}}$ : 40.7, 59.5, 71.3, 72.2, 79.7, 114.2, 118.4, 125.6, 127.5, 128.2, 128.9, 141.5, 147.9. Anal. Calcd for  $\text{C}_{17}\text{H}_{17}\text{NO}$ : C, 81.24; H, 6.82; N, 5.57. Found C, 81.17; H, 6.74; N, 5.49%.

### 1-Phenyl-2-(prop-2-ynyl(p-tolyl)amino)ethanol (3b)

Isolated as viscous liquid ;  $^1\text{H}$  NMR (300 MHz,  $\text{CDCl}_3$ )  $\delta_{\text{H}}$ : 2.23 (t, 1H,  $J = 2.4$  Hz, CH); 2.28 (s, 3H,  $\text{CH}_3$ ), 2.82 (s, 1H, OH), 3.34 (dd, 1H,  $J = 14.7, 9.6$  Hz,  $\text{CH}_2$ ), 3.59 (dd, 1H,  $J = 14.7, 3.3$  Hz,  $\text{CH}_2$ ), 3.96 - 4.09 (m, 2H,  $\text{CH}_2$ ), 4.95 (dd, 1H,  $J = 9.6, 3.3$  Hz,  $\text{CH}_2$ ), 6.91 (d, 2H,  $J = 8.7$  Hz, Ar-H), 7.10 (d, 2H,  $J = 8.1$  Hz, Ar-H), 7.29 - 7.45 (m, 5H, Ar-H).  $^{13}\text{C}$  NMR (75 MHz,  $\text{CDCl}_3$ )  $\delta_{\text{C}}$ : 20.3, 41.5, 60.2, 71.3, 72.5, 79.7, 115.6, 125.8, 127.6, 128.4, 128.6, 129.7, 141.6, 146.1. Anal. Calcd for  $\text{C}_{18}\text{H}_{19}\text{NO}$ : C, 81.47; H, 7.22; N, 5.28. Found C, 81.59; H, 7.11; N, 5.19%.

### 2-((4-Methoxyphenyl)(prop-2-ynyl)amino)-1-phenylethanol (3c)

Isolated as viscous liquid ;  $^1\text{H}$  NMR (300 MHz,  $\text{CDCl}_3$ )  $\delta_{\text{H}}$ : 2.26-2.27 (m, 1H, CH); 3.16 (s, 1H, OH), 3.23 (dd, 1H,  $J = 14.1, 9.9$  Hz,  $\text{CH}_2$ ), 3.57 (dd, 1H,  $J = 14.1, 3.3$  Hz,  $\text{CH}_2$ ), 3.80 (s, 3H,  $\text{OCH}_3$ ), 4.01 (m, 2H,  $\text{CH}_2$ ), 4.89 (dd, 1H,  $J = 9.6, 2.7$  Hz,  $\text{CH}_2$ ), 6.89 (d, 2H,  $J = 8.1$  Hz, Ar-H), 7.04 (d, 2H,  $J = 8.1$  Hz, Ar-H), 7.28 - 7.46 (m, 5H, Ar-H).  $^{13}\text{C}$  NMR (75 MHz,  $\text{CDCl}_3$ )  $\delta_{\text{C}}$ : 41.9, 55.2, 60.3, 70.6, 72.4, 79.4, 114.2, 117.7, 125.6, 127.2, 128.0, 141.8, 142.5, 153.2. Anal. Calcd for  $\text{C}_{18}\text{H}_{19}\text{NO}_2$ : C, 76.84; H, 6.81; N, 4.98. Found C, 76.72; H, 6.72; N, 4.93%.

### 2-((4-Fluorophenyl)(prop-2-ynyl)amino)-1-phenylethanol (3d)

Isolated as viscous liquid ;  $^1\text{H}$  NMR (300 MHz,  $\text{CDCl}_3$ )  $\delta_{\text{H}}$ : 2.23 (t, 1H,  $J = 2.4$  Hz, CH), 2.90 (s, 1H, OH), 3.36 (dd, 1H,  $J = 14.4, 9.3$  Hz,  $\text{CH}_2$ ), 3.53 (dd, 1H,  $J = 3.6, 14.4$  Hz,  $\text{CH}_2$ ), 3.90 - 4.03 (m, 2H,  $\text{CH}_2$ ), 4.87 - 4.90 (m, 1H,  $\text{CH}_2$ ), 6.88 - 6.99 (m, 4H, Ar-H), 7.27 - 7.41 (m, 5H, Ar-H).  $^{13}\text{C}$  NMR (75 MHz,  $\text{CDCl}_3$ )  $\delta_{\text{C}}$ : 42.0, 60.46, 71.3, 72.9, 79.3, 115.6, 117.3, 125.8, 127.9, 128.5, 141.4, 145.1, 157.0. Anal. Calcd for  $\text{C}_{17}\text{H}_{16}\text{FNO}$ : C, 75.82; H, 5.99; N, 5.20; Found C, 75.75; H, 6.08; N, 5.13%.

**2-((4-Bromophenyl)(prop-2-ynyl)amino)-1-phenylethanol (3e)**

Isolated as viscous liquid; <sup>1</sup>H NMR (300 MHz, CDCl<sub>3</sub>) δ<sub>H</sub>: 2.70 (t, 1H, *J* = 2.1 Hz, CH); 2.82 (s, 1H, OH), 3.47 (dd, 1H, *J* = 15.0, 8.7 Hz, CH<sub>2</sub>), 3.60 (dd, 1H, *J* = 15.0, 3.9 Hz, CH<sub>2</sub>), 3.96 - 4.06 (m, 2H, CH<sub>2</sub>), 4.97 - 5.01 (m, 1H, CH<sub>2</sub>), 6.83 (d, 2H, *J* = 9.0 Hz, Ar-H), 7.34 - 7.46 (m, 7H, Ar-H). <sup>13</sup>C NMR (75 MHz, CDCl<sub>3</sub>) δ<sub>C</sub>: 40.5, 59.3, 71.3, 72.2, 79.2, 115.2, 125.6, 127.4, 128.1\*, 131.4, 141.8, 146.9. Anal. Calcd for C<sub>17</sub>H<sub>16</sub>BrNO: C, 61.83; H, 4.88, N, 4.24; Found C, 61.874; H, 4.81; N, 4.20%.

**1-(4-Chlorophenyl)-2-((4-chlorophenyl)(prop-2-ynyl)amino)ethanol (3f)**

Isolated as viscous liquid; <sup>1</sup>H NMR (300 MHz, CDCl<sub>3</sub>) δ<sub>H</sub>: 2.08 (t, 1H, *J* = 2.4 Hz, CH); 2.62 (s, 1H, OH), 3.20 (dd, 1H, *J* = 14.7, 9.0 Hz, CH<sub>2</sub>), 3.38 (dd, 1H, *J* = 15.0, 3.6 Hz, CH<sub>2</sub>), 3.77 - 3.92 (m, 2H, CH<sub>2</sub>), 4.75 - 4.80 (m, 1H, CH<sub>2</sub>), 6.68 (d, 2H, *J* = 9.3 Hz, Ar-H), 7.03 - 7.08 (m, 2H, Ar-H), 7.12 - 7.18 (m, 4H, Ar-H). <sup>13</sup>C NMR (75 MHz, CDCl<sub>3</sub>) δ<sub>C</sub>: 41.3, 59.9, 70.9, 72.8, 79.2, 115.8, 123.9, 127.2, 128.6, 129.0, 133.5, 140.0, 146.7. Anal. Calcd for C<sub>17</sub>H<sub>15</sub>Cl<sub>2</sub>NO: C, 63.76; H, 4.72; N, 4.37. Found C, 63.60; H, 4.66; N, 4.28%.

**2-(Phenyl(prop-2-ynyl)amino)-1-*p*-tolylethanol (3g)**

Isolated as viscous liquid; <sup>1</sup>H NMR (300 MHz, CDCl<sub>3</sub>) δ<sub>H</sub>: 2.19 (m, 1H, CH); 2.32 (s, 3H, CH<sub>3</sub>), 2.82 (s, 1H, OH), 3.38 (dd, 1H, *J* = 14.7, 9.3 Hz, CH<sub>2</sub>), 3.57 (dd, 1H, *J* = 15.0, 9.3 Hz, CH<sub>2</sub>), 3.99 - 4.13 (m, 2H, CH<sub>2</sub>), 4.92 (dd, 1H, *J* = 9.3, 3.3 Hz, CH<sub>2</sub>), 6.82 (t, 1H, *J* = 7.5 Hz, Ar-H), 6.93 (d, 2H, *J* = 8.4 Hz, Ar-H), 7.14 - 7.30 (m, 6H, Ar-H). <sup>13</sup>C NMR (75 MHz, CDCl<sub>3</sub>) δ<sub>C</sub>: 21.0, 41.0, 59.9, 71.4, 72.3, 79.7, 114.4, 118.6, 125.7, 126.7, 129.1, 137.3, 138.6, 148.1. Anal. Calcd for C<sub>18</sub>H<sub>19</sub>NO: C, 81.47; H, 7.22; N, 5.28. Found C, 81.42; H, 7.32; N, 5.12%.

**2-((4-Chlorophenyl)(prop-2-ynyl)amino)-1-*p*-tolylethanol (3h)**

Isolated as viscous liquid; <sup>1</sup>H NMR (300 MHz, CDCl<sub>3</sub>) δ<sub>H</sub>: 2.26 (t, 1H, *J* = 2.4 Hz, CH); 2.38 (s, 3H, CH<sub>3</sub>), 2.52 (s, 1H, OH), 3.44 (dd, 1H, *J* = 15.0, 9.00 Hz, CH<sub>2</sub>), 3.58 (dd, 1H, *J* = 14.7, 3.6 Hz, CH<sub>2</sub>), 3.97 - 4.12 (m, 2H, CH<sub>2</sub>), 4.96 (dd, 1H, *J* = 9.0, 3.6 Hz, CH<sub>2</sub>), 6.88 (d, 2H, *J* = 8.7 Hz, Ar-H), 7.20 - 7.27 (m, 4H, Ar-H), 7.33 (d, 2H, *J* = 8.1 Hz, Ar-H). <sup>13</sup>C NMR (75 MHz, CDCl<sub>3</sub>) δ<sub>C</sub>: 20.9, 40.7, 59.5, 71.3, 72.4, 79.3, 115.1, 122.9, 125.6, 128.7, 128.9, 137.2, 138.5, 146.6. Anal. Calcd for C<sub>18</sub>H<sub>18</sub>ClNO: C, 72.11; H, 6.05; N, 4.67. Found C, 71.94; H, 6.13; N, 4.60%.

**1-(Biphenyl-4-yl)-2-(phenyl(prop-2-ynyl)amino)ethanol (3i)**

Isolated as viscous liquid; <sup>1</sup>H NMR (300 MHz, CDCl<sub>3</sub>) δ<sub>H</sub>: 2.18 (m, 1H, CH), 2.80 (s, 1H, OH), 3.31 (dd, 1H, *J* = 14.7, 9.9 Hz, CH<sub>2</sub>), 3.58 (dd, 1H, *J* = 14.4, 2.7 Hz, CH<sub>2</sub>), 4.0 (m, 2H, CH<sub>2</sub>), 4.93-4.96 (m, 1H, CH<sub>2</sub>), 6.87 (d, 1H, *J* = 8.1 Hz, Ar-H), 7.06 (d, 2H, *J* = 8.4 Hz, Ar-

H), 7.29 (d, 2H,  $J = 6.9$  Hz, Ar-H), 7.35 - 7.46 (m, 4H, Ar-H), 7.50 - 7.56 (m, 5H, Ar-H).  $^{13}\text{C}$  NMR (75 MHz,  $\text{CDCl}_3$ )  $\delta_{\text{C}}$ : 41.8, 60.3, 71.1, 72.7, 79.7, 115.9, 125.9, 126.3, 127.0, 127.2\*, 128.7\*, 129.0, 140.6, 140.7, 146.2. Anal. Calcd for  $\text{C}_{23}\text{H}_{21}\text{NO}$  C, 84.37; H, 6.46; N, 4.28. Found C, 84.23; H, 6.55; N, 4.16%. (\* Two carbons merged together)

### **1-(Biphenyl-4-yl)-2-(prop-2-ynyl(*p*-tolyl)amino)ethanol (3j)**

Isolated as viscous liquid;  $^1\text{H}$  NMR (300 MHz,  $\text{CDCl}_3$ )  $\delta_{\text{H}}$ : 2.25 (m, 1H, CH); 2.29 (s, 3H,  $\text{CH}_3$ ), 3.38 (dd, 1H,  $J = 14.7, 9.6$  Hz,  $\text{CH}_2$ ), 3.65 (dd, 1H,  $J = 14.4, 3.3$  Hz,  $\text{CH}_2$ ), 3.98-4.07 (m, 2H,  $\text{CH}_2$ ), 5.01 (dd, 1H,  $J = 9.6, 3.0$  Hz,  $\text{CH}_2$ ), 6.94 (d, 2H,  $J = 8.4$  Hz, Ar-H), 7.12 (d, 2H,  $J = 8.4$  Hz, Ar-H), 7.36 (d, 2H,  $J = 7.5$  Hz, Ar-H), 7.42 - 7.50 (m, 3H, Ar-H), 7.51 (d, 2H,  $J = 8.4$  Hz, Ar-H), 7.57 - 7.63 (m, 3H, Ar-H);  $^{13}\text{C}$  NMR (75 MHz,  $\text{CDCl}_3$ )  $\delta_{\text{C}}$ : 20.3, 41.7, 60.2, 71.1, 72.6, 79.7, 115.7, 126.3, 127.0, 127.1, 127.2\*, 128.7, 128.9, 129.7, 140.6, 140.7, 146.1. Anal. Calcd for  $\text{C}_{24}\text{H}_{23}\text{NO}$ : C, 84.42; H, 6.79; N, 4.10. Found C, 84.25; H, 6.71; N, 4.03%.

### **2-((4-Chlorophenyl)(prop-2-ynyl)amino)-1-(naphthalen-2-yl)ethanol (3k)**

Isolated as viscous liquid;  $^1\text{H}$  NMR (300 MHz,  $\text{CDCl}_3$ )  $\delta_{\text{H}}$ : 2.24-2.25 (m, 1H, CH), 3.51 (dd, 1H,  $J = 15.0, 9.0$  Hz,  $\text{CH}_2$ ), 3.67 (dd, 1H,  $J = 14.7, 3.6$  Hz,  $\text{CH}_2$ ), 4.02-4.10 (m, 2H,  $\text{CH}_2$ ), 5.13-5.16 (m, 1H,  $\text{CH}_2$ ), 6.90 (d, 2H,  $J = 8.4$  Hz, Ar-H), 7.48-7.57 (m, 3H, Ar-H), 7.80 - 7.88 (m, 5H, Ar-H), 7.98 (s, 1H, Ar-H).  $^{13}\text{C}$  NMR (75 MHz,  $\text{CDCl}_3$ )  $\delta_{\text{C}}$ : 41.1, 59.8, 71.7, 72.4, 79.3, 115.4, 123.3, 123.8, 124.7, 125.8, 126.1, 127.6, 127.8, 128.2, 128.9, 132.9, 133.1, 139.2, 147.7. Anal. Calcd for  $\text{C}_{21}\text{H}_{18}\text{ClNO}$ : C, 75.11; H, 5.40; N, 4.17. Found C, 75.26; H, 5.23; N, 4.04%.

### **1-(4-Nitrophenyl)-2-(phenyl(prop-2-ynyl)amino)ethanol (3l)**

Isolated as viscous liquid;  $^1\text{H}$  NMR (300 MHz,  $\text{CDCl}_3$ )  $\delta_{\text{H}}$ : 2.23 (s, 1H, CH), 3.19 (s, 1H, OH), 3.28-2.36 (m, 1H,  $\text{CH}_2$ ), 3.58-3.63 (m, 1H,  $\text{CH}_2$ ), 3.94-4.09 (m, 2H,  $\text{CH}_2$ ), 4.93-5.06 (m, 1H,  $\text{CH}_2$ ), 6.84 - 6.92 (m, 2H, Ar-H), 7.22 - 7.24 (m, 2H, Ar-H), 7.46 - 7.58 (m, 3H, Ar-H), 8.15 (t, 2H,  $J = 8.1$  Hz, Ar-H).  $^{13}\text{C}$  NMR (75 MHz,  $\text{CDCl}_3$ )  $\delta_{\text{C}}$ : 41.3, 59.6, 70.6, 72.6, 79.4, 114.8, 119.1, 123.4, 126.0, 129.1, 147.2, 147.9, 153.5. Anal. Calcd for  $\text{C}_{17}\text{H}_{16}\text{N}_2\text{O}_3$ : C, 68.91; H, 5.44; N, 9.45. Found C, 68.75; H, 5.36; N, 9.30%.

### **2,4-Diphenyl-1,4-oxazepan-7-one (6a)**

Isolated as viscous liquid;  $^1\text{H}$  NMR (300 MHz,  $\text{CDCl}_3$ )  $\delta_{\text{H}}$ : 2.92 (dd, 1H,  $J = 14.7, 5.7$  Hz,  $\text{CH}_2$ ), 3.20 (t, 1H,  $J = 14.1$  Hz,  $\text{CH}_2$ ), 3.47 (dd, 1H,  $J = 14.7, 5.4$  Hz,  $\text{CH}_2$ ), 3.57 (dd, 1H,  $J = 15.3, 8.4$  Hz,  $\text{CH}_2$ ), 3.97 (d, 2H,  $J = 15.0$  Hz,  $\text{CH}_2$ ), 5.54 (d, 1H,  $J = 8.1$  Hz, CH), 6.90 (t, 2H,  $J = 8.7$  Hz, Ar-H), 7.28 - 7.43 (m, 8H, Ar-H).  $^{13}\text{C}$  NMR (75 MHz,  $\text{CDCl}_3$ )  $\delta_{\text{C}}$ : 36.3, 46.4, 60.0, 80.6, 116.3, 125.9\*, 128.6, 128.8, 129.7, 137.9, 148.7, 173.0. Anal. Calcd for

C<sub>17</sub>H<sub>17</sub>NO<sub>2</sub>: C, 76.38; H, 6.41; N, 5.24. Found C, 76.47; H, 6.47; N, 5.12%. \* Two carbons merged together.

#### **2-Phenyl-4-*p*-tolyl-1,4-oxazepan-7-one (6b)**

Isolated as viscous liquid; <sup>1</sup>H NMR (300 MHz, CDCl<sub>3</sub>) δ<sub>H</sub>: 2.29 (s, 3H, CH<sub>3</sub>), 2.90 (dd, 1H, *J* = 14.7, 6.0 Hz, CH<sub>2</sub>), 3.22 (t, 1H, *J* = 14.4 Hz, CH<sub>2</sub>), 3.44 (dd, 1H, *J* = 14.4, 11.1 Hz, CH<sub>2</sub>), 3.54 (dd, 1H, *J* = 15.3, 8.4 Hz, CH<sub>2</sub>), 3.91 (d, 2H, *J* = 14.7 Hz, CH), 5.55 (d, 1H, *J* = 8.4 Hz, CH), 6.81 (d, 2H, *J* = 8.7 Hz, Ar-H), 7.12 (d, 2H, *J* = 8.7 Hz, Ar-H), 7.35 - 7.43 (m, 5H, Ar-H). <sup>13</sup>C NMR (75 MHz, CDCl<sub>3</sub>) δ<sub>C</sub>: 20.4, 36.1, 46.8, 60.3, 80.6, 116.7, 125.9, 128.6, 128.8, 129.8, 130.2, 138.0, 146.4, 173.4. Anal. Calcd for C<sub>18</sub>H<sub>19</sub>NO<sub>2</sub>: C, 76.84; H, 6.81; N, 4.98. Found C, 76.90; H, 6.92; N, 5.05 %.

#### **4-(4-Methoxyphenyl)-2-phenyl-1,4-oxazepan-7-one (6c)**

Isolated as viscous liquid; <sup>1</sup>H NMR (300 MHz, CDCl<sub>3</sub>) δ<sub>H</sub>: 2.73 (dd, 1H, *J* = 14.1, 6.3 Hz, CH<sub>2</sub>), 3.01-3.10 (m, 1H, CH<sub>2</sub>), 3.14-3.20 (m, 1H, CH<sub>2</sub>), 3.30 (dd, 1H, *J* = 15.0, 8.4 Hz, CH<sub>2</sub>), 3.50-3.60 (m, 5H, CH<sub>2</sub>), 5.40 (d, 1H, *J* = 8.4 Hz, CH), 6.70 (s, 4H, Ar-H), 7.16 - 7.28 (m, 5H, Ar-H). <sup>13</sup>C NMR (75 MHz, CDCl<sub>3</sub>) δ<sub>C</sub>: 36.5, 48.2, 55.6, 61.6, 80.8, 114.8, 119.6, 125.9, 128.5, 128.8, 138.0, 143.6, 154.3, 173.4. Anal. Calcd for C<sub>18</sub>H<sub>19</sub>NO<sub>3</sub>: C, 72.71; H, 6.44; N, 4.71. Found C, 72.61; H, 6.38; N, 4.78%.

#### **4-(4-Fluorophenyl)-2-phenyl-1,4-oxazepan-7-one (6d)**

Isolated as viscous liquid; <sup>1</sup>H NMR (300 MHz, CDCl<sub>3</sub>) δ<sub>H</sub>: 2.82 (dd, 1H, *J* = 14.7, 6.3 Hz, CH<sub>2</sub>), 3.06-3.18 (m, 1H, CH<sub>2</sub>), 3.25-3.33 (m, 1H, CH<sub>2</sub>), 3.40 (dd, 1H, *J* = 15.3, 8.7 Hz, CH<sub>2</sub>), 3.69 (d, 2H, *J* = 14.7 Hz, CH<sub>2</sub>), 5.44 (d, 1H, *J* = 8.4 Hz, CH), 6.73 - 6.77 (m, 2H, Ar-H), 6.87-6.93 (m, 2H, Ar-H), 7.31 - 7.36 (m, 5H, Ar-H). <sup>13</sup>C NMR (75 MHz, CDCl<sub>3</sub>) δ<sub>C</sub>: 36.2, 47.5, 60.9, 80.5, 116.0, 118.6, 125.8, 128.4, 128.5, 137.8, 145.8, 157.3, 173.0. Anal. Calcd for C<sub>17</sub>H<sub>16</sub>FNO<sub>2</sub>: C, 71.56; H, 5.65; N, 4.91. Found C, 71.47; H, 5.75; N, 4.83%.

#### **4-(4-Bromophenyl)-2-phenyl-1,4-oxazepan-7-one (6e)**

Isolated as colorless solid; m.p. 124 °C. <sup>1</sup>H NMR (300 MHz, CDCl<sub>3</sub>) δ<sub>H</sub>: 2.80 (dd, 1H, *J* = 15.0, 5.7 Hz, CH<sub>2</sub>), 3.05 (dd, 1H, *J* = 13.8 Hz, CH<sub>2</sub>), 3.31 - 3.49 (m, 2H, CH<sub>2</sub>), 3.77 - 3.82 (m, 2H, CH<sub>2</sub>), 5.39 (d, 1H, *J* = 8.1 Hz, CH), 6.64 (d, 2H, *J* = 8.1 Hz, Ar-H), 7.29 - 7.32 (m, 7H, Ar-H). <sup>13</sup>C NMR (75 MHz, CDCl<sub>3</sub>) δ<sub>C</sub>: 35.84, 45.9, 59.5, 80.2, 112.0, 117.6, 125.7, 128.7, 128.8, 132.4, 137.5, 147.4, 172.8. Anal. Calcd for C<sub>17</sub>H<sub>16</sub>BrNO<sub>2</sub>: C, 58.97; H, 4.66; N, 4.05. Found C, 59.02; H, 4.59; N, 4.11%.

#### **2,4-Bis(4-chlorophenyl)-1,4-oxazepan-7-one (6f)**

Isolated as viscous liquid;  $^1\text{H}$  NMR (300 MHz,  $\text{CDCl}_3$ )  $\delta_{\text{H}}$ : 2.85 (dd, 1H,  $J = 14.7, 5.7$  Hz,  $\text{CH}_2$ ), 3.10 (t, 1H,  $J = 15.0$  Hz,  $\text{CH}_2$ ), 3.25 - 3.48 (m, 2H,  $\text{CH}_2$ ), 3.75 - 3.85 (m, 2H,  $\text{CH}_2$ ), 5.41 (d, 1H,  $J = 8.4$  Hz, CH), 6.71 (d, 2H,  $J = 9.0$  Hz, Ar-H), 7.18 (d, 2H,  $J = 8.7$  Hz, Ar-H), 7.26 - 7.33 (m, 4H, Ar-H).  $^{13}\text{C}$  NMR (75 MHz,  $\text{CDCl}_3$ )  $\delta_{\text{C}}$ : 35.8, 46.2, 59.7, 79.6, 117.4, 125.0, 127.1, 129.0, 129.5, 134.4, 136.0, 147.0, 172.7. Anal. Calcd for  $\text{C}_{17}\text{H}_{15}\text{Cl}_2\text{NO}_2$ : C, 60.73; H, 4.50; N, 4.17. Found C, 60.66; H, 4.58; N, 4.11%.

#### **4-Phenyl-2-*p*-tolyl-1,4-oxazepan-7-one (6g)**

Isolated as viscous liquid;  $^1\text{H}$  NMR (300 MHz,  $\text{CDCl}_3$ )  $\delta_{\text{H}}$ : 2.34 (s, 3H,  $\text{CH}_3$ ), 2.77 (dd, 1H,  $J = 14.4, 5.1$  Hz,  $\text{CH}_2$ ), 3.14 (t, 1H,  $J = 14.8$  Hz,  $\text{CH}_2$ ), 3.38 - 3.47 (m, 1H,  $\text{CH}_2$ ), 3.53 (dd, 1H,  $J = 15.3, 8.4$  Hz,  $\text{CH}_2$ ), 3.92 (d, 2H,  $J = 14.7$  Hz,  $\text{CH}_2$ ), 5.48 (d, 1H,  $J = 8.4$  Hz, CH), 6.84 - 6.90 (m, 2H, Ar-H), 7.17 - 7.22 (m, 3H, Ar-H), 7.29 - 7.32 (m, 4H, Ar-H).  $^{13}\text{C}$  NMR (75 MHz,  $\text{CDCl}_3$ )  $\delta_{\text{C}}$ : 21.3, 36.1, 46.1, 59.7, 80.4, 116.1, 119.9, 125.7, 129.1, 129.4, 129.6, 134.9, 138.4, 173.3. Anal. Calcd for  $\text{C}_{18}\text{H}_{19}\text{NO}_2$ : C, 76.84; H, 6.81; N, 4.98. Found C, 76.90; H, 6.73; N, 4.86%.

#### **4-(4-Chlorophenyl)-2-(4-methylphenyl)-1,4-oxazepan-7-one (6h)**

Isolated as viscous liquid;  $^1\text{H}$  NMR (300 MHz,  $\text{CDCl}_3$ )  $\delta_{\text{H}}$ : 2.36 (s, 3H,  $\text{CH}_3$ ), 2.91 (dd, 1H,  $J = 15.0, 6.0$  Hz,  $\text{CH}_2$ ), 3.11 - 3.21 (m, 1H,  $\text{CH}_2$ ), 3.41-3.49 (m, 2H,  $\text{CH}_2$ ), 3.85 - 3.93 (m, 2H,  $\text{CH}_2$ ), 5.47 (d, 1H,  $J = 8.4$  Hz, CH), 6.78 (d, 2H,  $J = 9.3$  Hz, Ar-H), 7.22 - 7.31 (m, 6H, Ar-H).  $^{13}\text{C}$  NMR (75 MHz,  $\text{CDCl}_3$ )  $\delta_{\text{C}}$ : 21.2, 36.0, 46.3, 59.8, 80.4, 117.5, 124.9, 125.8, 129.3, 129.6, 134.7, 138.6, 147.2, 173.1. Anal. Calcd for  $\text{C}_{18}\text{H}_{18}\text{ClNO}_2$ : C, 68.46; H, 5.75; N, 4.44. Found C, 68.57; H, 5.66; N, 4.49%.

#### **2-(Biphenyl-4-yl)-4-phenyl-1,4-oxazepan-7-one (6i)**

Isolated as viscous liquid;  $^1\text{H}$  NMR (300 MHz,  $\text{CDCl}_3$ )  $\delta_{\text{H}}$ : 2.86 (dd, 1H,  $J = 14.7, 5.7$  Hz,  $\text{CH}_2$ ), 3.17 (t, 1H,  $J = 14.6$  Hz,  $\text{CH}_2$ ), 3.40 (dd, 1H,  $J = 14.4, 11.1$  Hz,  $\text{CH}_2$ ), 3.53 (dd, 1H,  $J = 15.3, 8.4$  Hz,  $\text{CH}_2$ ), 3.85 - 3.94 (m, 2H,  $\text{CH}_2$ ), 5.55 (d, 1H,  $J = 8.4$  Hz, CH), 6.79 (d, 2H,  $J = 8.7$  Hz, Ar-H), 7.11 (d, 2H,  $J = 8.4$  Hz, Ar-H), 7.31 - 7.36 (m, 1H, Ar-H), 7.40 - 7.48 (m, 5H, Ar-H), 7.54 - 7.61 (m, 4H, Ar-H).  $^{13}\text{C}$  NMR (75 MHz,  $\text{CDCl}_3$ )  $\delta_{\text{C}}$ : 36.0, 46.6, 60.1, 80.2, 116.6, 126.2, 127.0, 127.4, 127.5, 128.7, 129.6, 130.1, 136.8, 140.3, 141.4, 146.3, 173.2. Anal. Calcd for  $\text{C}_{23}\text{H}_{21}\text{NO}_2$ : C, 80.44; H, 6.16; N, 4.08. Found C, 80.34; H, 6.09; N, 4.19%.

#### **2-(Biphenyl-4-yl)-4-*p*-tolyl-1,4-oxazepan-7-one (6j)**

Isolated as colourless liquid; m.p. 105 °C.  $^1\text{H}$  NMR (300 MHz,  $\text{CDCl}_3$ )  $\delta_{\text{H}}$ : 2.29 (s, 3H,  $\text{CH}_3$ ), 2.91 (dd, 1H,  $J = 14.4, 5.4$  Hz,  $\text{CH}_2$ ), 3.22 (t, 1H,  $J = 14.4$  Hz,  $\text{CH}_2$ ), 3.40-3.49 (m, 1H,  $\text{CH}_2$ ), 3.57 (dd, 1H,  $J = 15.3, 8.4$  Hz,  $\text{CH}_2$ ), 3.96 (d, 2H,  $J = 15.0$  Hz,  $\text{CH}_2$ ), 5.59 (d, 1H,  $J = 8.1$  Hz,

CH), 6.82 (d, 2H,  $J = 8.1$  Hz, Ar-H), 7.12 (d, 2H,  $J = 8.1$  Hz, Ar-H), 7.38 (d, 2H,  $J = 7.2$  Hz, Ar-H), 7.44 (d, 2H,  $J = 7.5$  Hz, Ar-H), 7.50 (d, 2H,  $J = 8.4$  Hz, Ar-H), 7.58 - 7.64 (m, 3H, Ar-H).  $^{13}\text{C}$  NMR (75 MHz,  $\text{CDCl}_3$ )  $\delta_{\text{C}}$ : 20.3, 36.1, 46.8, 60.3, 80.4, 116.7, 126.3, 127.1, 127.5\*, 128.8, 129.8, 130.2, 136.9, 140.4, 141.5, 146.4, 173.4. Anal. Calcd for  $\text{C}_{24}\text{H}_{23}\text{NO}_2$ : C, 80.64; H, 6.49; N, 3.92. Found C, 80.73; H, 6.60; N, 4.08%. (\*Two carbons merged together)

#### **4-(4-Chlorophenyl)-2-(naphthalen-2-yl)-1,4-oxazepan-7-one (6k)**

Isolated as viscous liquid;  $^1\text{H}$  NMR (300 MHz,  $\text{CDCl}_3$ )  $\delta_{\text{H}}$ : 2.98 (dd, 1H,  $J = 15.3, 6.3$  Hz,  $\text{CH}_2$ ), 3.25 (t, 1H,  $J = 12.6$  Hz,  $\text{CH}_2$ ), 3.51 (t, 1H,  $J = 12.6$  Hz,  $\text{CH}_2$ ), 3.64 (dd, 1H,  $J = 15.0, 7.5$  Hz,  $\text{CH}_2$ ), 3.97 - 4.02 (m, 2H,  $\text{CH}_2$ ), 5.69 (d, 1H,  $J = 8.1$  Hz, CH), 6.84 (d, 2H,  $J = 8.4$  Hz, Ar-H), 7.48 - 7.55 (m, 4H, Ar-H), 7.87 - 7.96 (m, 5H, Ar-H).  $^{13}\text{C}$  NMR (75 MHz,  $\text{CDCl}_3$ )  $\delta_{\text{C}}$ : 36.0, 46.4, 60.0, 80.5, 117.5, 123.3, 125.0, 125.1, 126.5, 126.6, 127.7, 128.1, 128.9, 129.6, 133.1, 133.2, 134.8, 147.2, 173.0. Anal. Calcd for  $\text{C}_{21}\text{H}_{18}\text{ClNO}_2$ : C, 71.69; H, 5.16; N, 3.98. Found C, 71.80; H, 5.05; N, 3.85%.

#### **2-(4-Nitrophenyl)-4-phenyl-1,4-oxazepan-7-one (6l)**

Isolated as viscous liquid;  $^1\text{H}$  NMR (300 MHz,  $\text{CDCl}_3$ )  $\delta_{\text{H}}$ : 2.90 (dd, 1H,  $J = 14.7, 5.4$  Hz,  $\text{CH}_2$ ), 3.17-3.26 (m, 1H,  $\text{CH}_2$ ), 3.39-3.48 (m, 1H,  $\text{CH}_2$ ), 3.53 (dd, 1H,  $J = 15.3, 8.4$  Hz,  $\text{CH}_2$ ), 3.89 - 3.96 (m, 2H,  $\text{CH}_2$ ), 5.55 (d, 1H,  $J = 8.4$  Hz, CH), 6.81 (d, 2H,  $J = 8.4$  Hz, Ar-H), 7.13 (d, 2H,  $J = 8.4$  Hz, Ar-H), 7.33 - 7.45 (m, 5H, Ar-H).  $^{13}\text{C}$  NMR (75 MHz,  $\text{CDCl}_3$ )  $\delta_{\text{C}}$ : 36.1, 46.8, 60.3, 80.5, 116.6, 125.8, 128.5, 128.8, 129.7, 130.2, 137.9, 146.4, 173.3. Anal. Calcd for  $\text{C}_{17}\text{H}_{16}\text{N}_2\text{O}_4$ : C, 65.38; H, 5.16; N, 8.97. Found C, 65.50; H, 5.09; N, 8.88%.



# Spectral copies

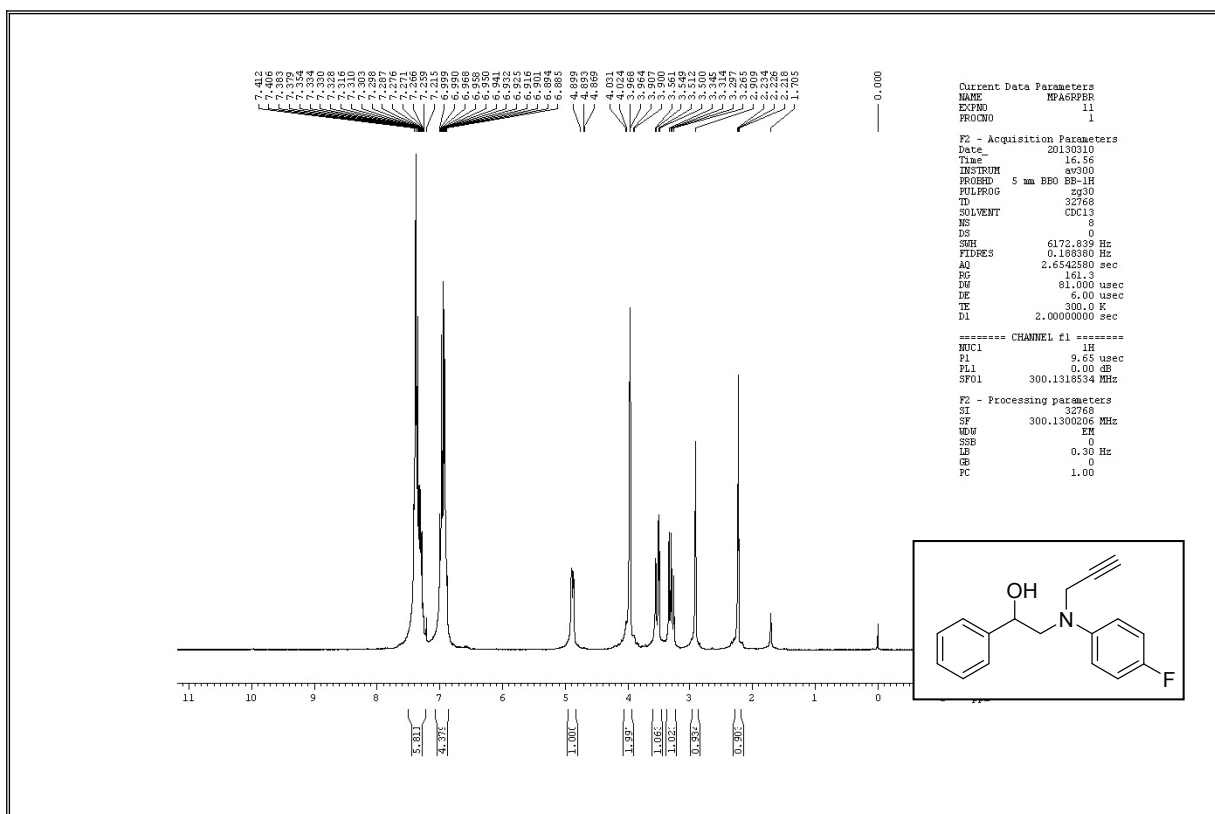

**Figure 1. <sup>1</sup>H NMR spectrum of 3d**

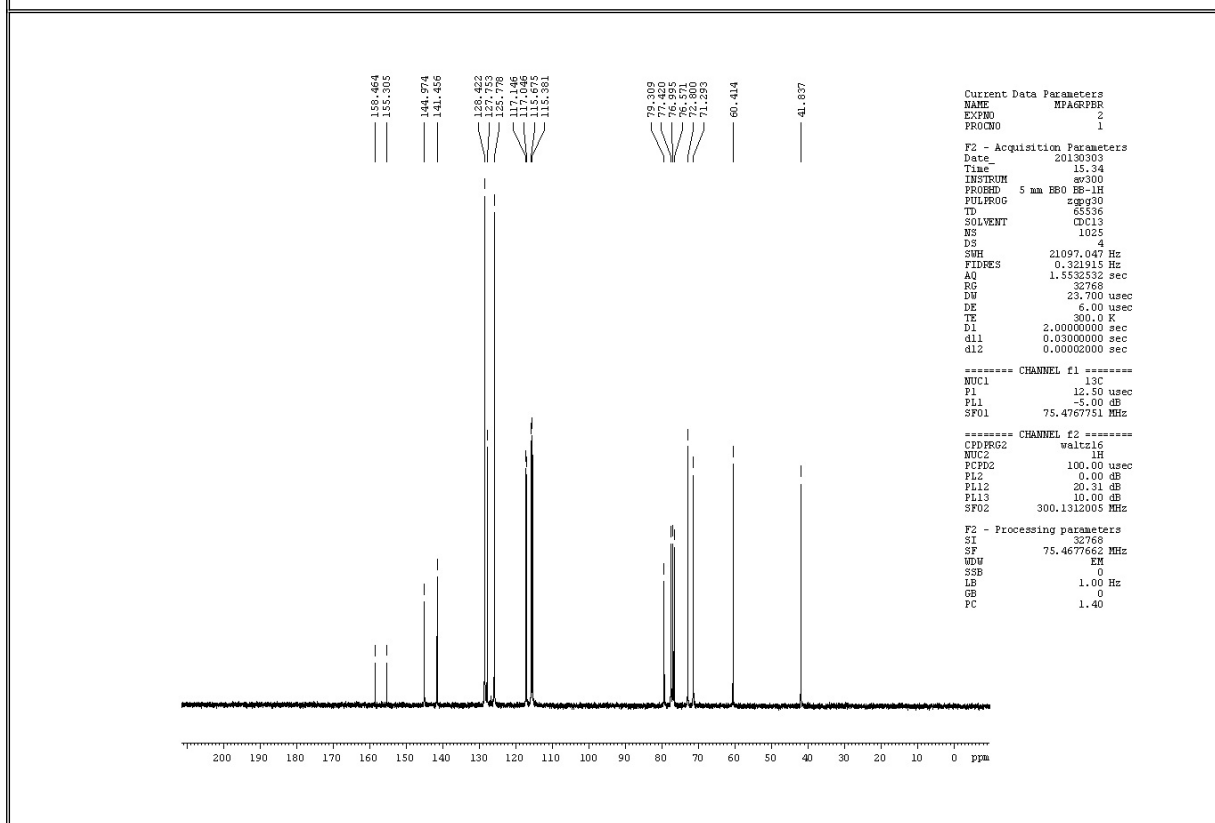

**Figure 2. <sup>13</sup>C NMR spectrum of 3d**



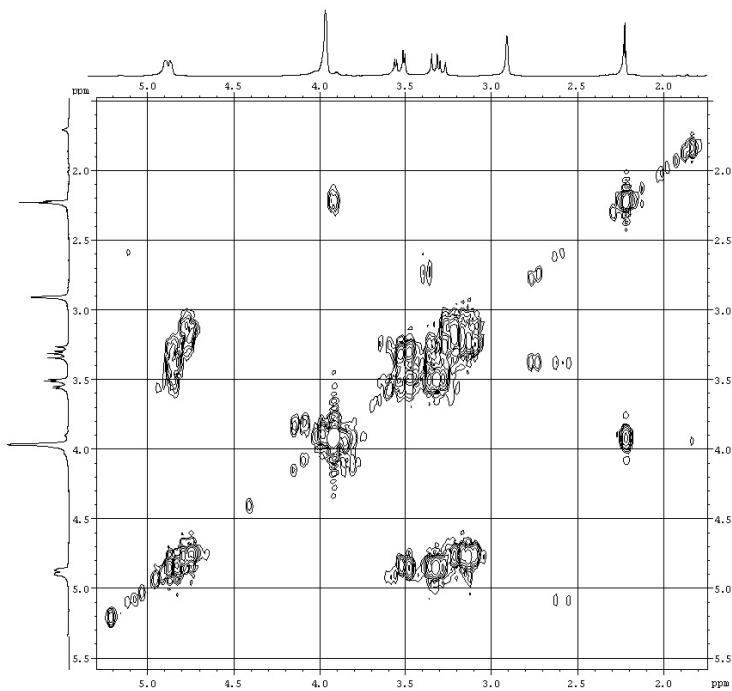

Figure 5. H,H-COSY spectrum of **3d** (expanded)

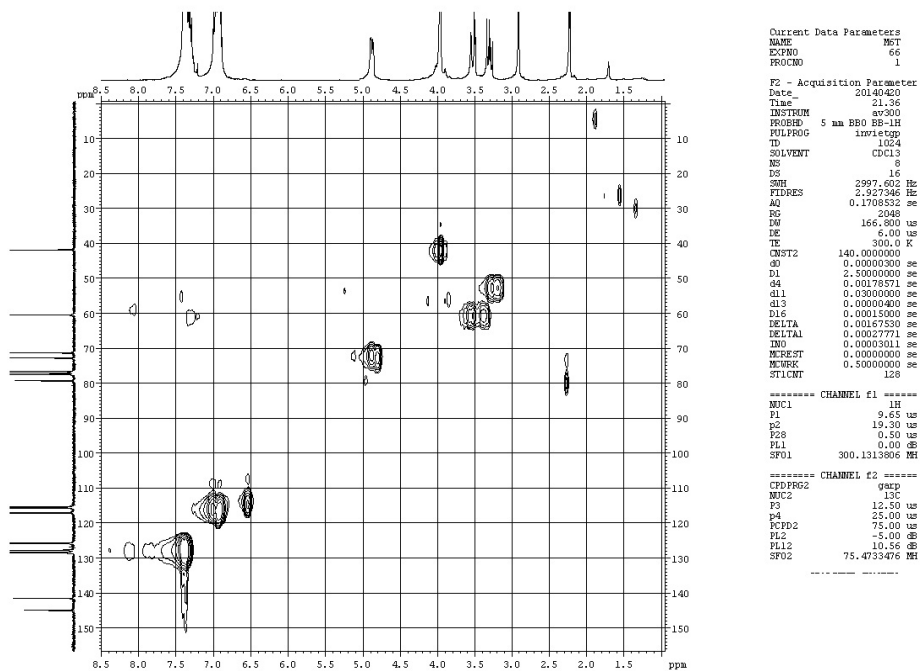

Figure 6. C,H-COSY spectrum of **3d**

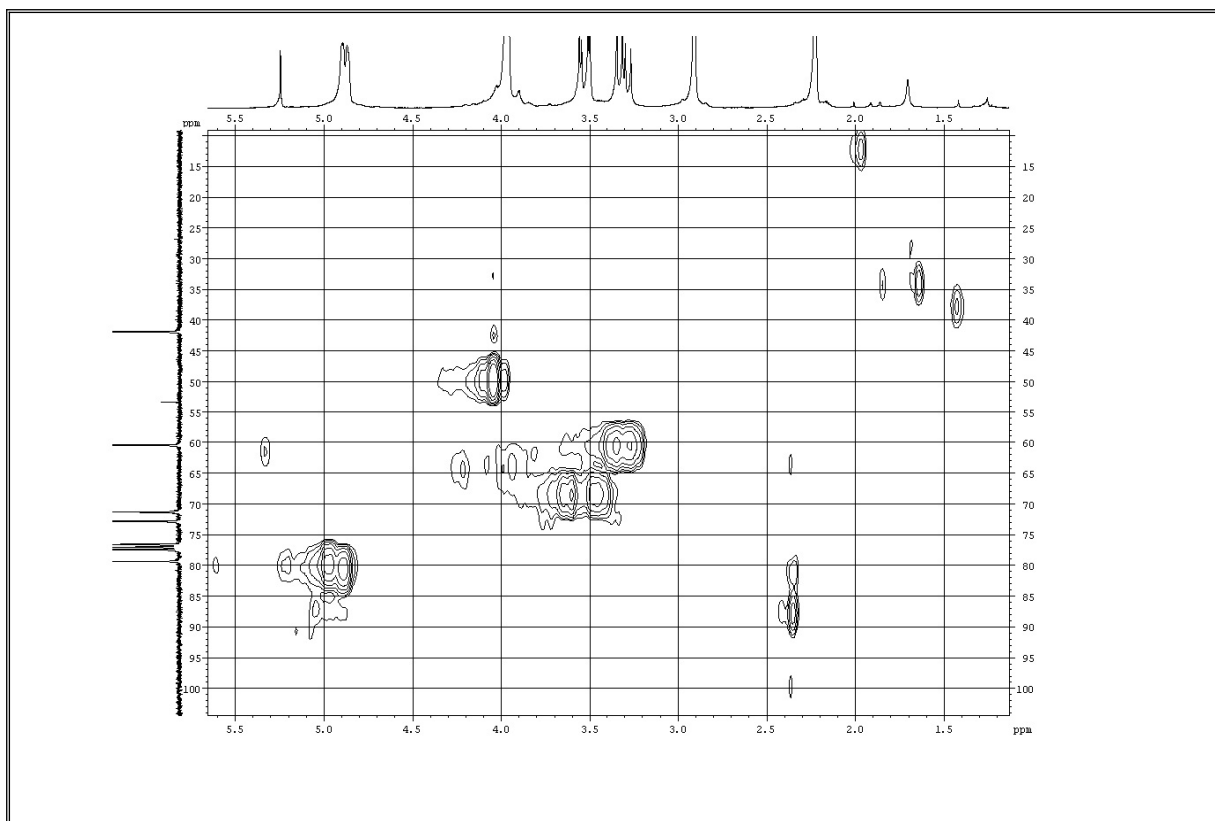

Figure 7. C,H-COSY spectrum of **3d** (expanded)

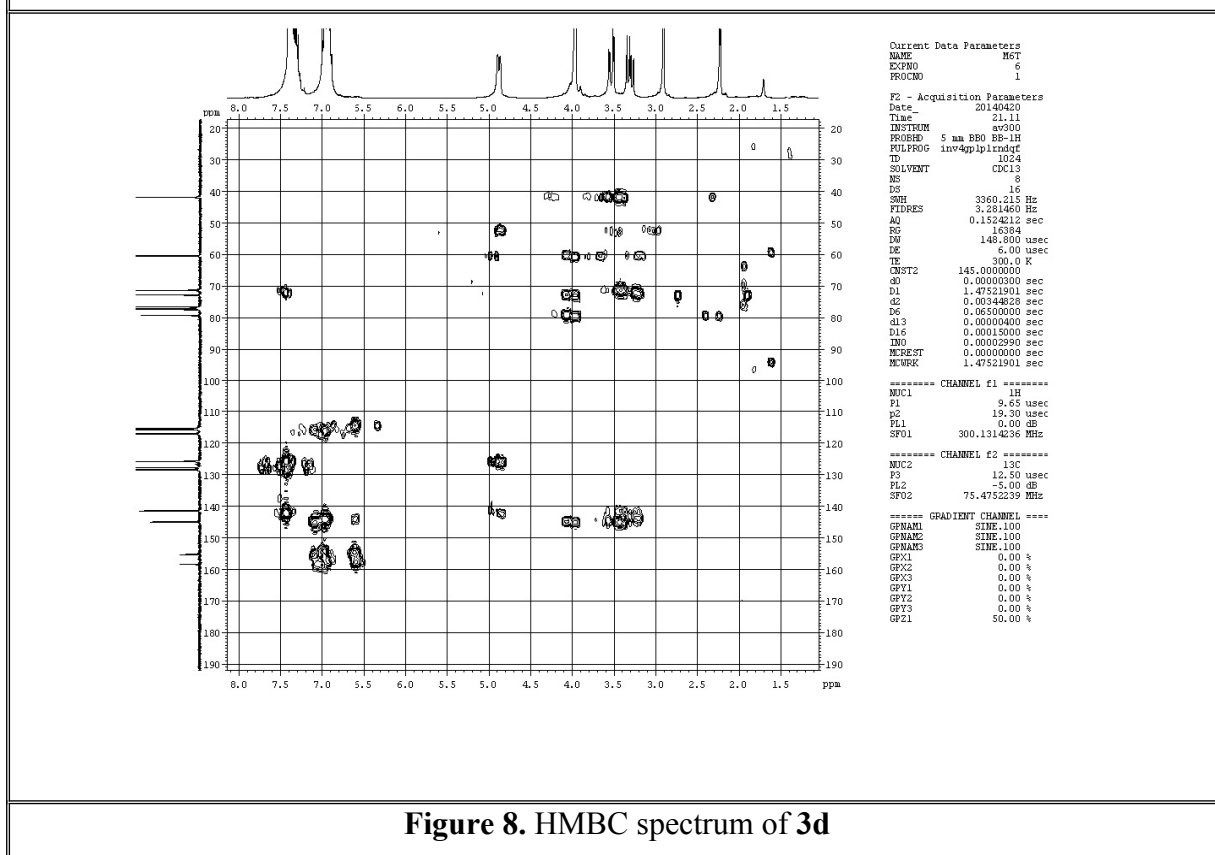

Figure 8. HMBC spectrum of **3d**

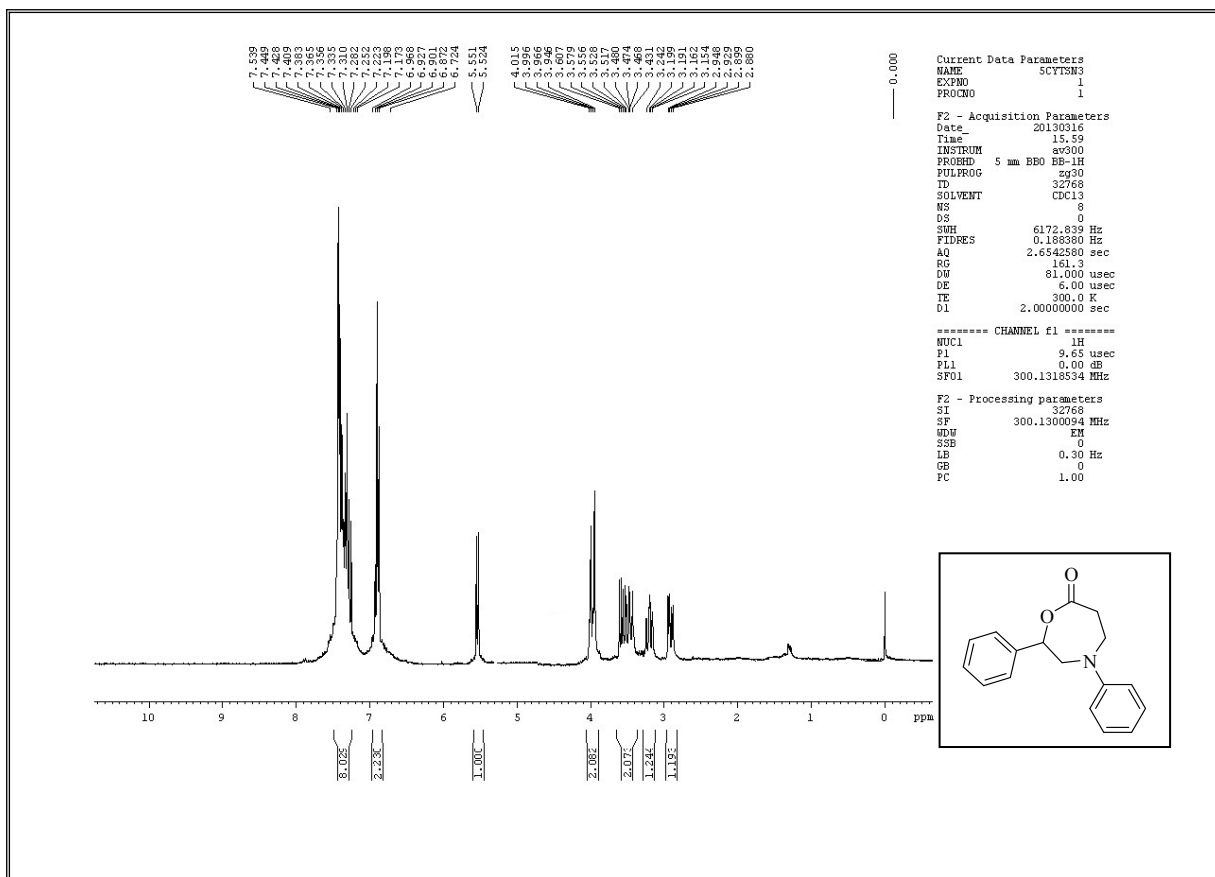

Figure 9. <sup>1</sup>H NMR spectrum of 6a

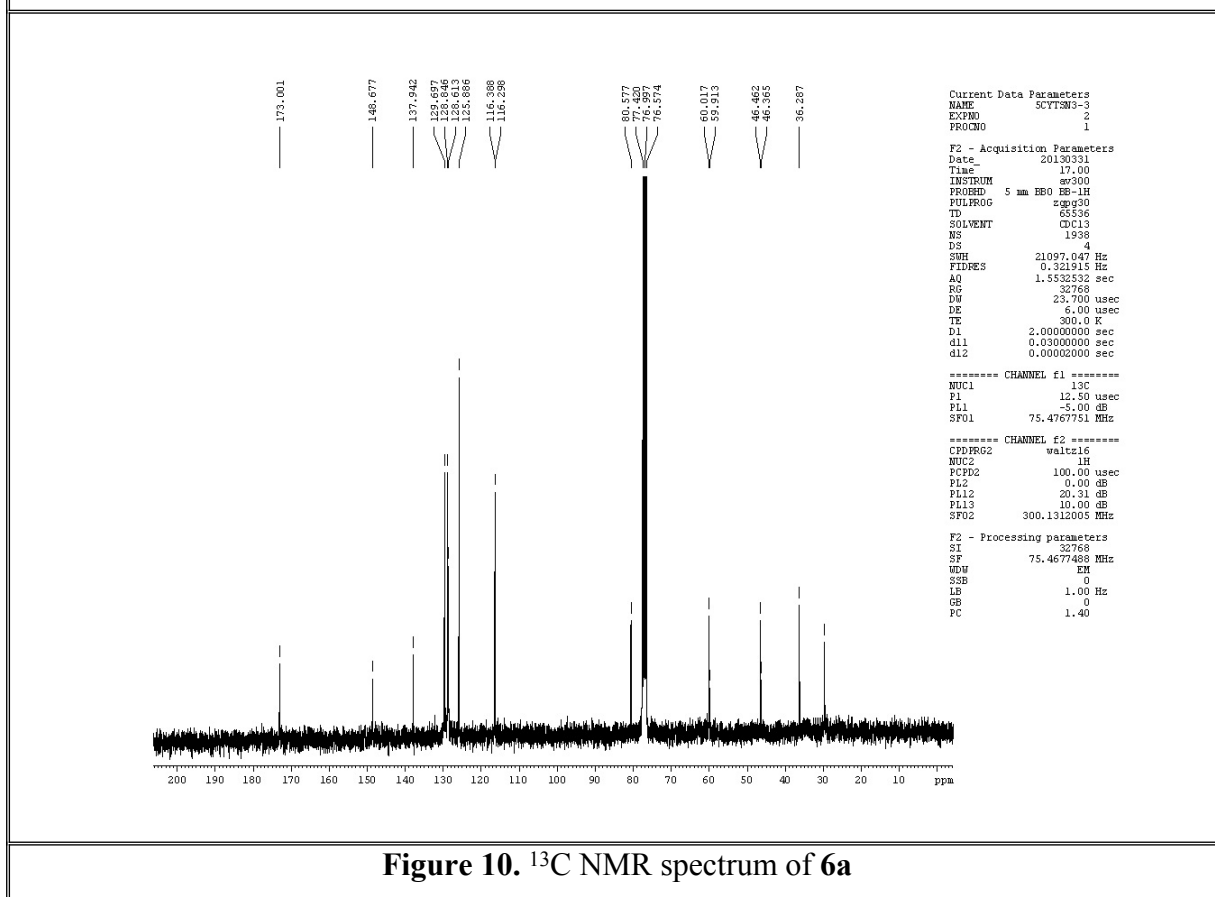

Figure 10. <sup>13</sup>C NMR spectrum of 6a

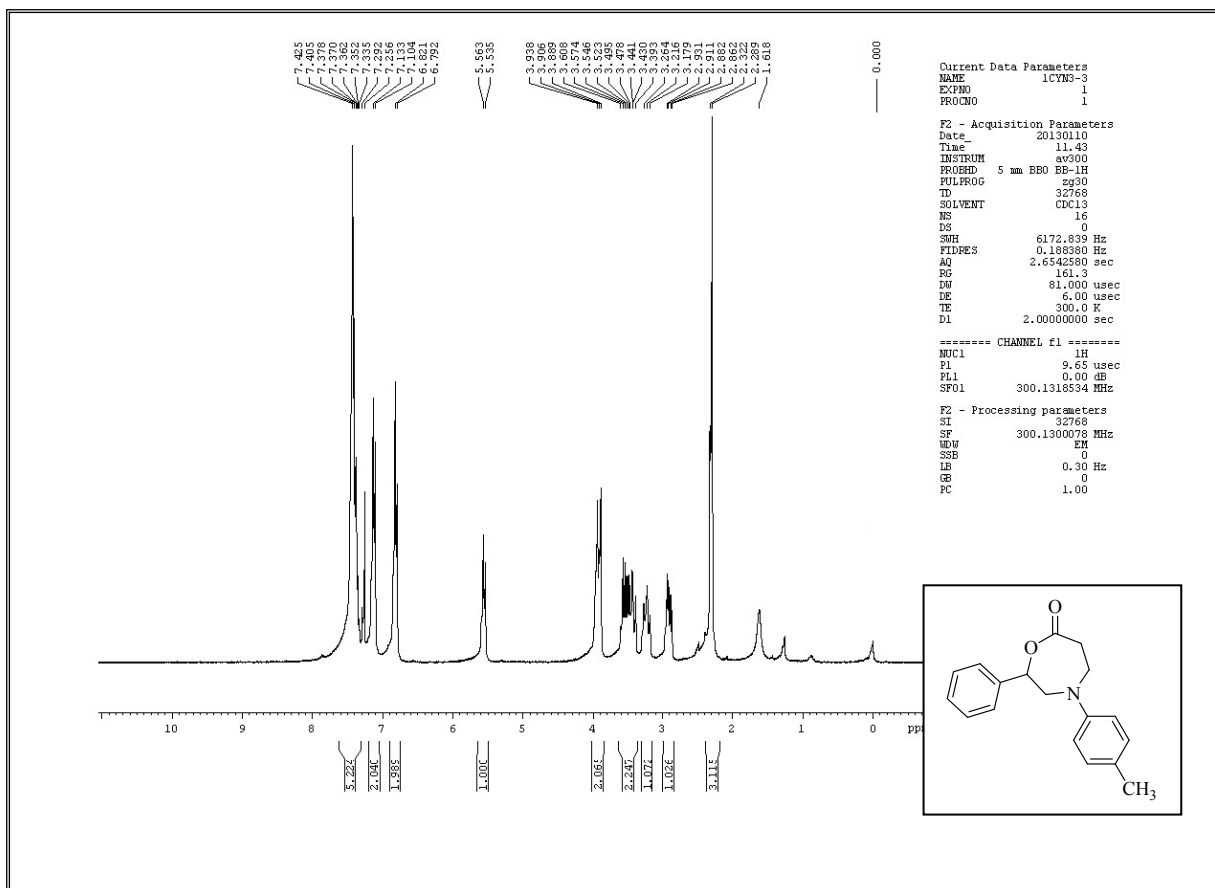

Figure 11. <sup>1</sup>H NMR spectrum of 6b

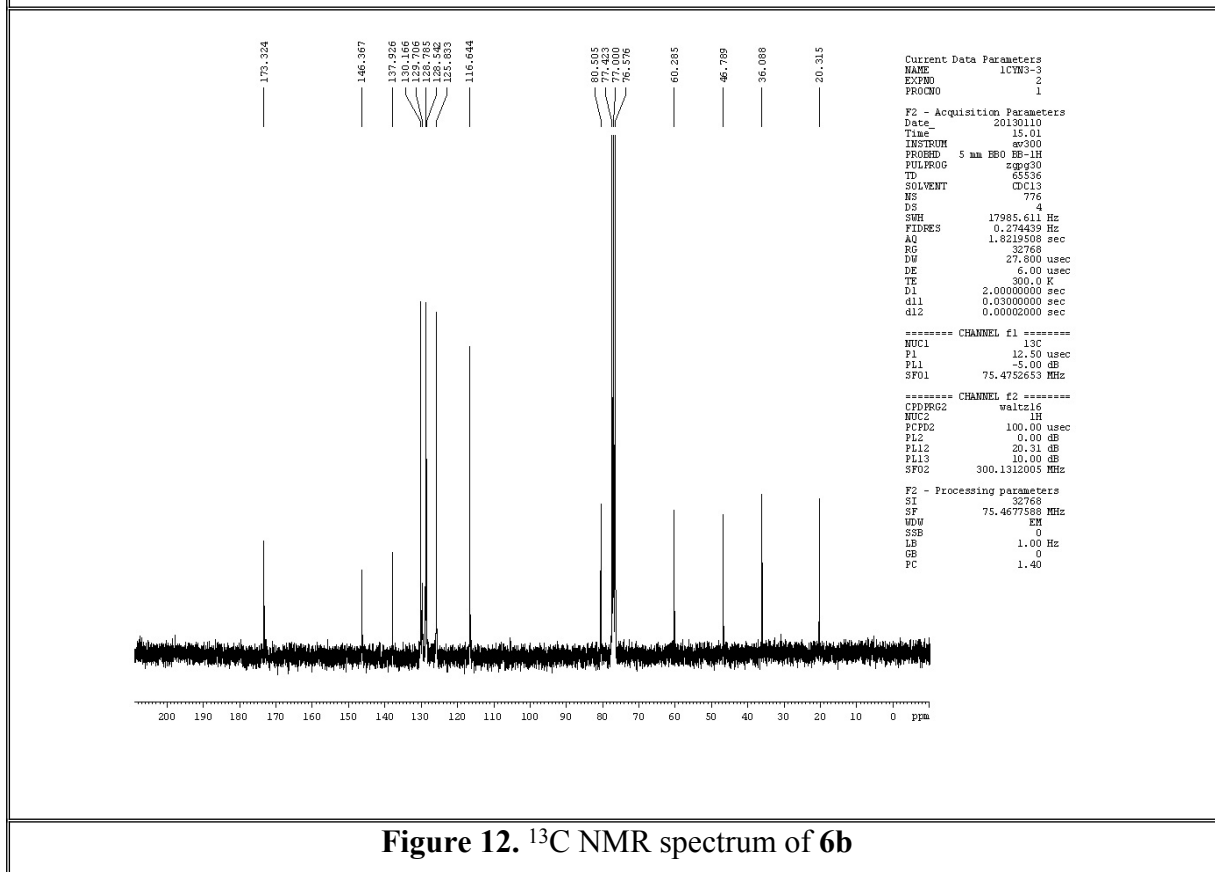

Figure 12. <sup>13</sup>C NMR spectrum of 6b



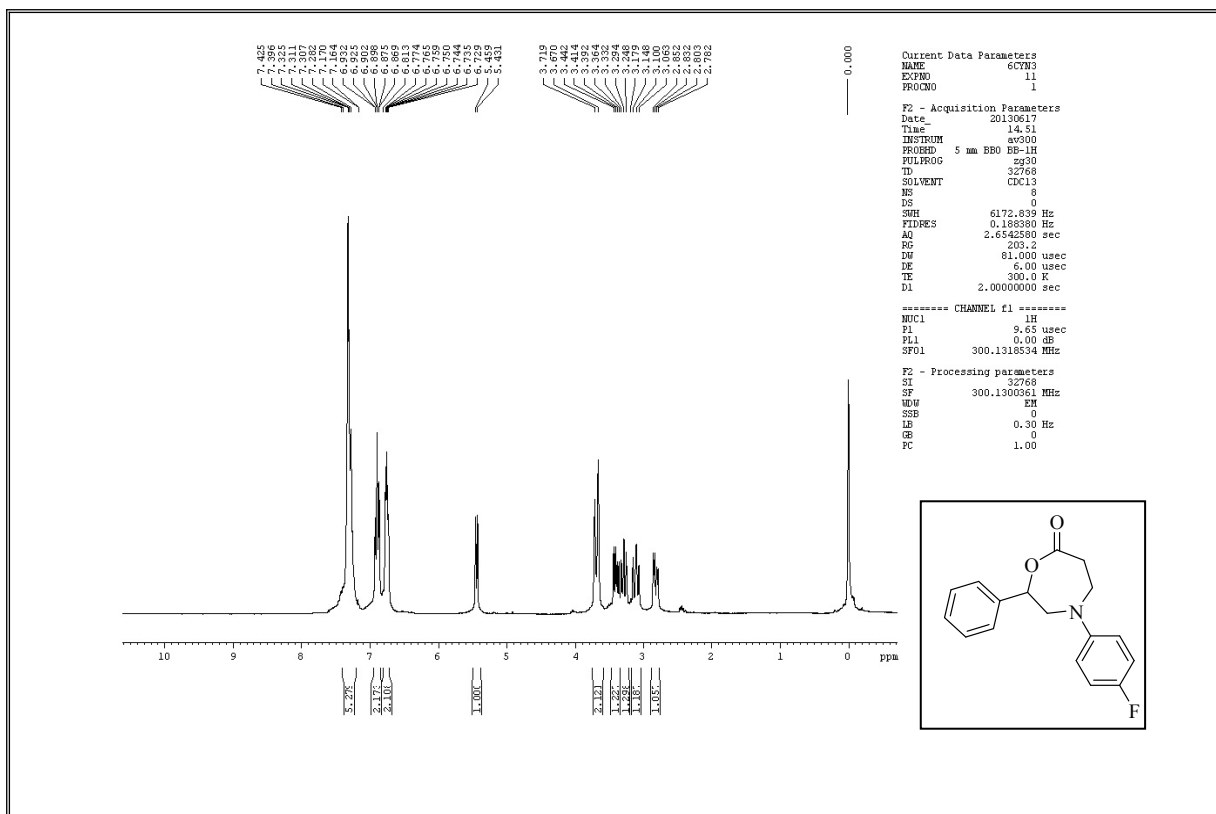

Figure 15. <sup>1</sup>H NMR spectrum of 6d

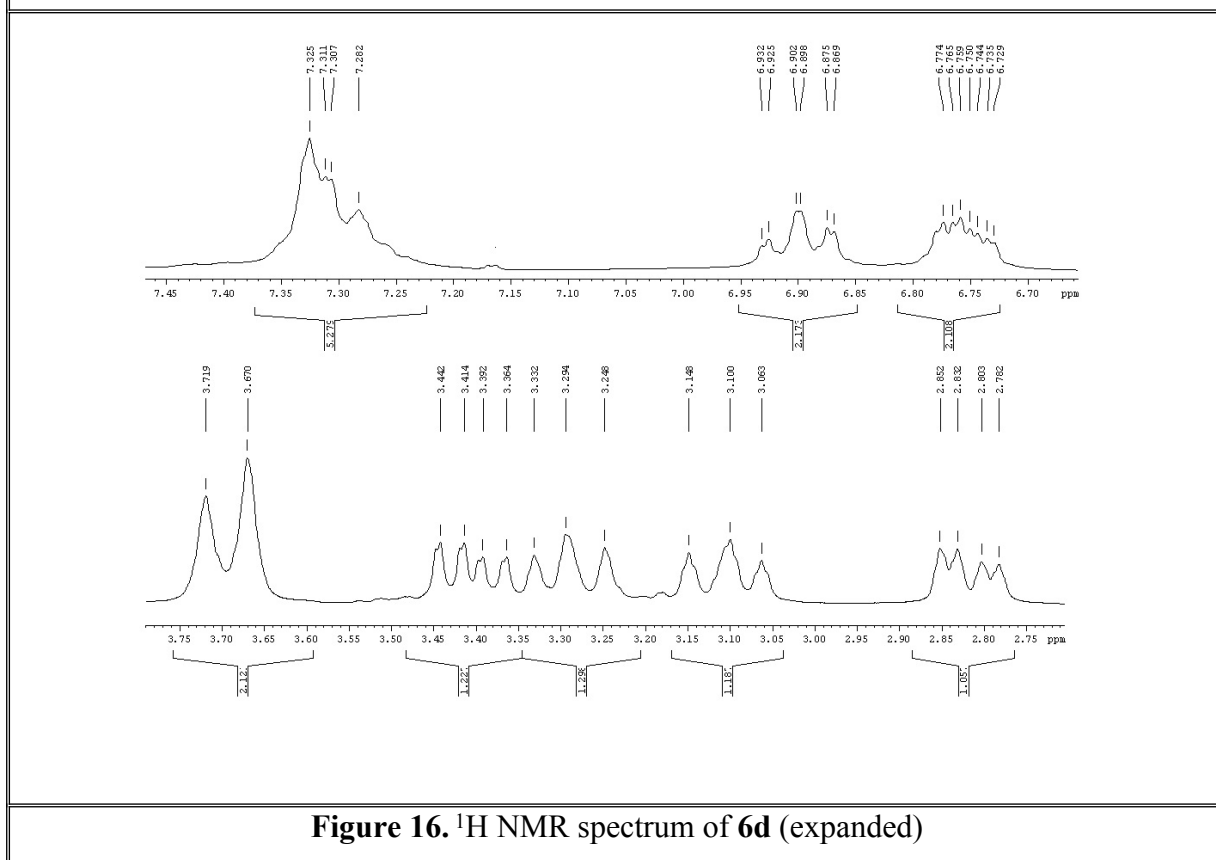

Figure 16. <sup>1</sup>H NMR spectrum of 6d (expanded)



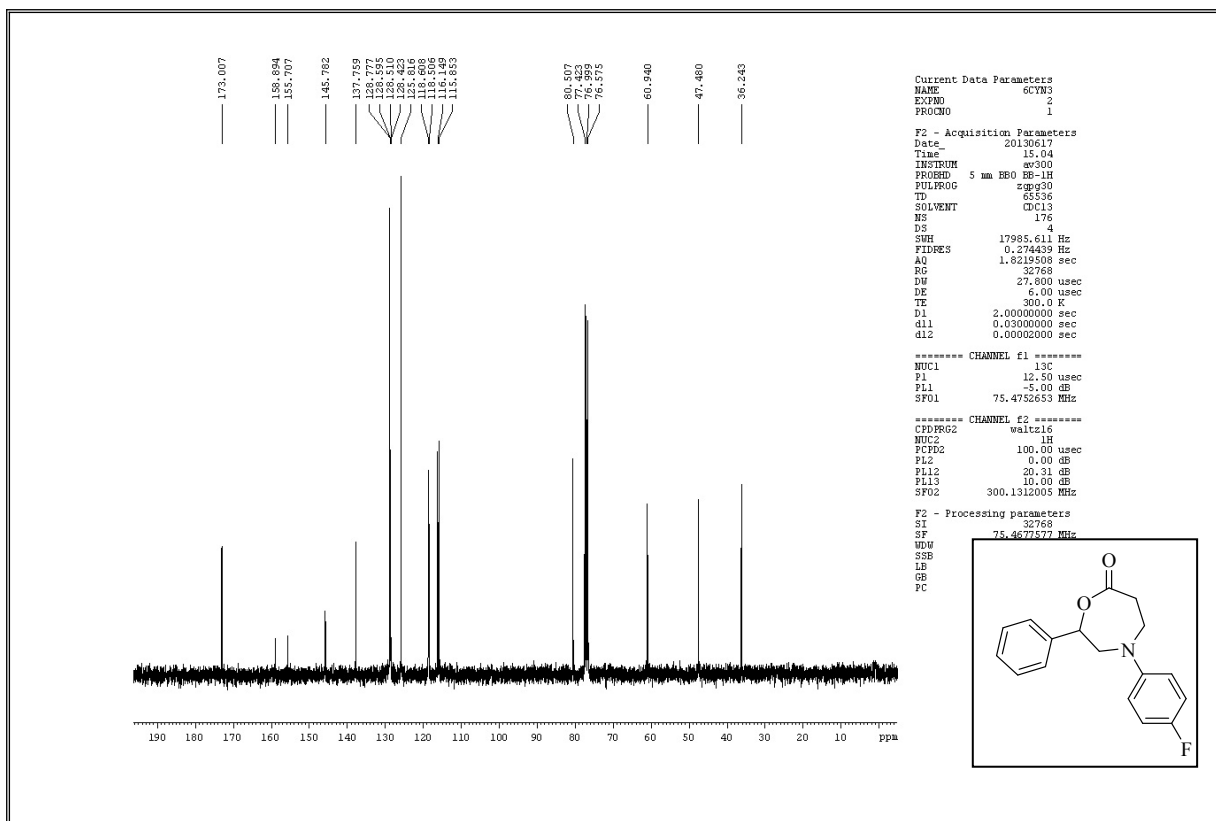

Figure 17. <sup>13</sup>C NMR spectrum of 6d

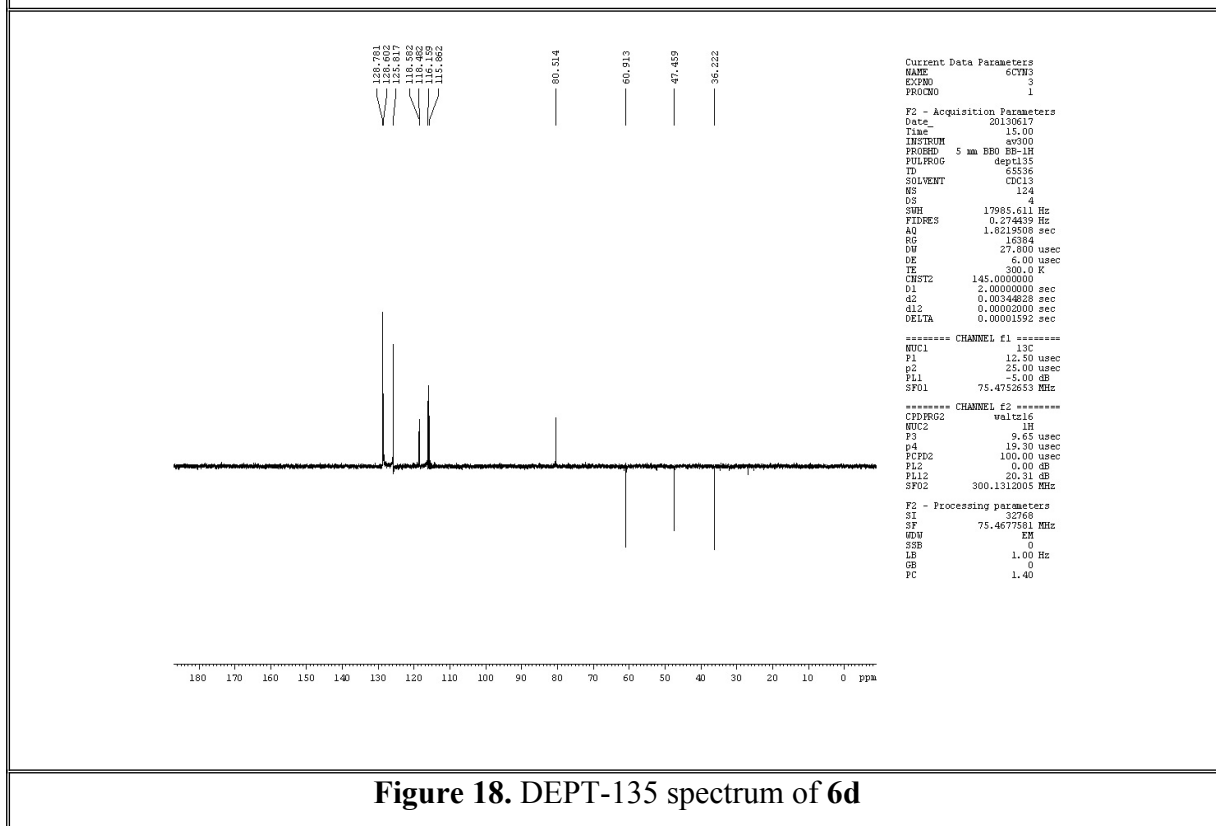

Figure 18. DEPT-135 spectrum of 6d

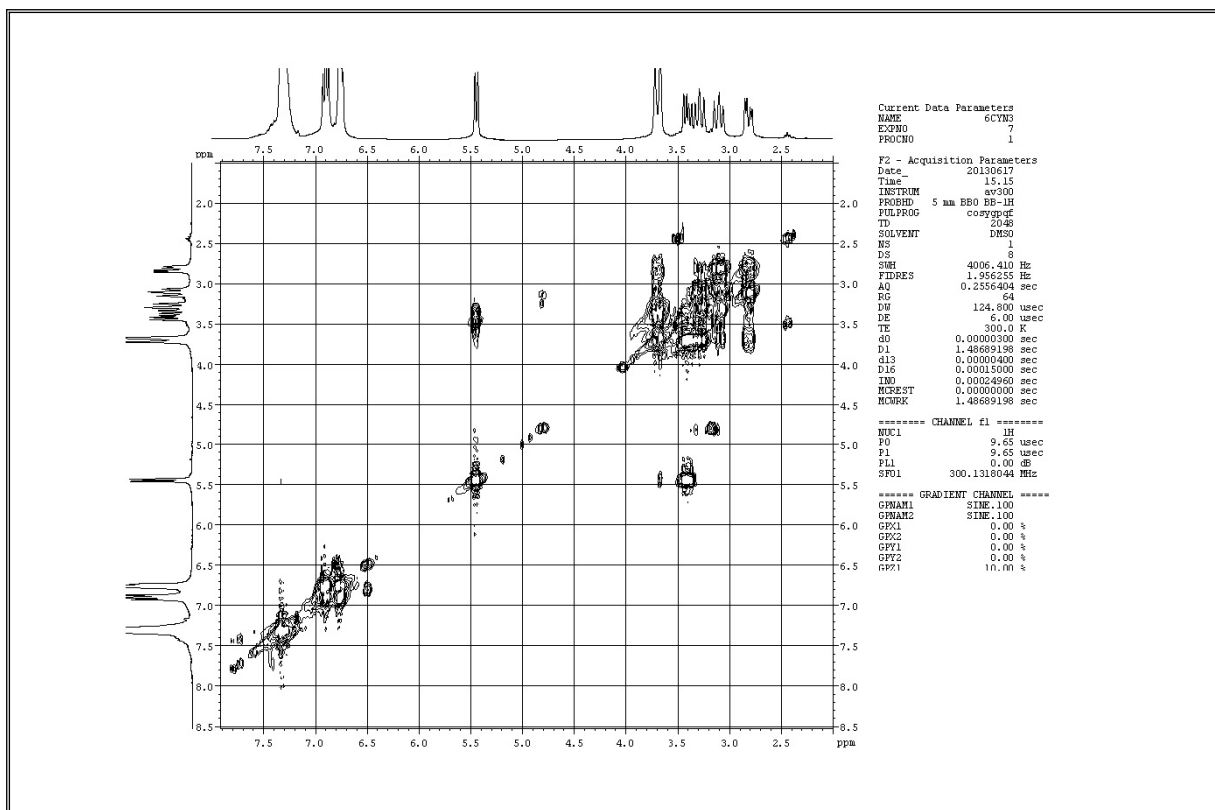

Figure 19. H,H-COSY spectrum of 6d

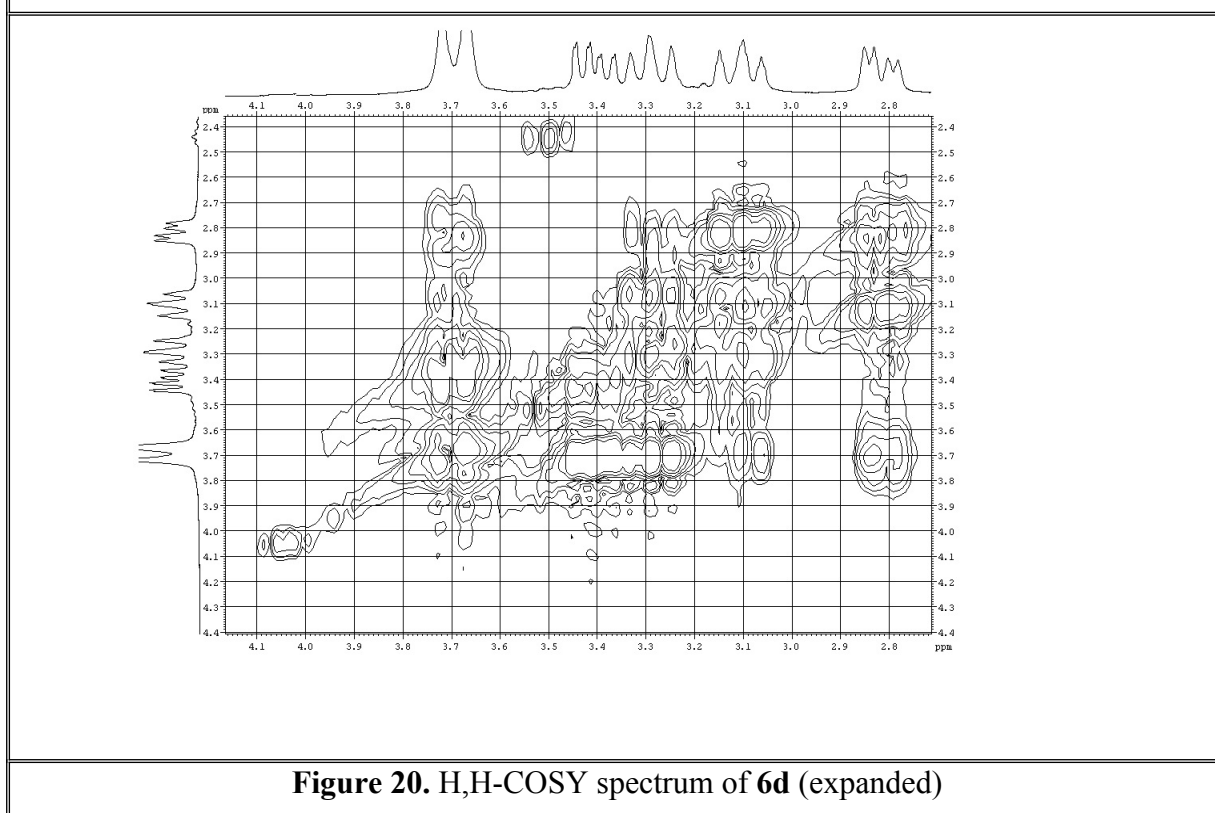

Figure 20. H,H-COSY spectrum of 6d (expanded)

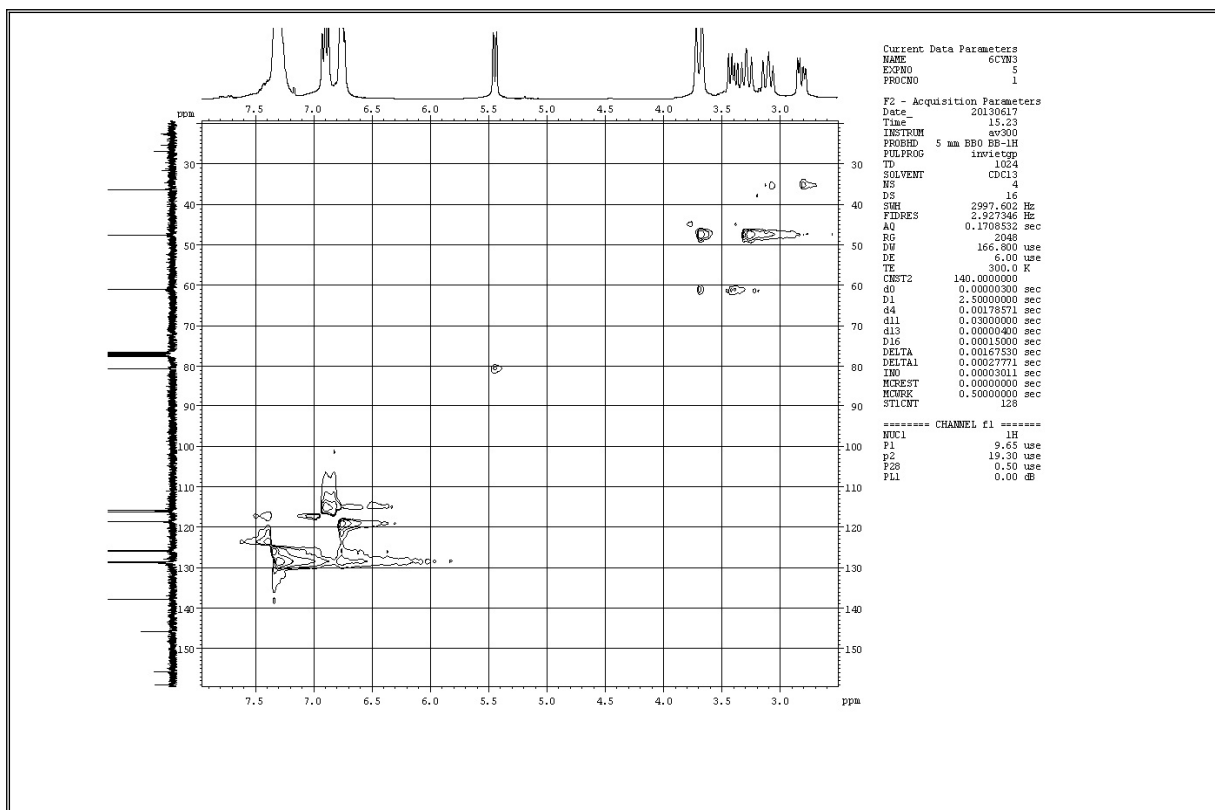

Figure 21. C,H-COSY spectrum of 3d

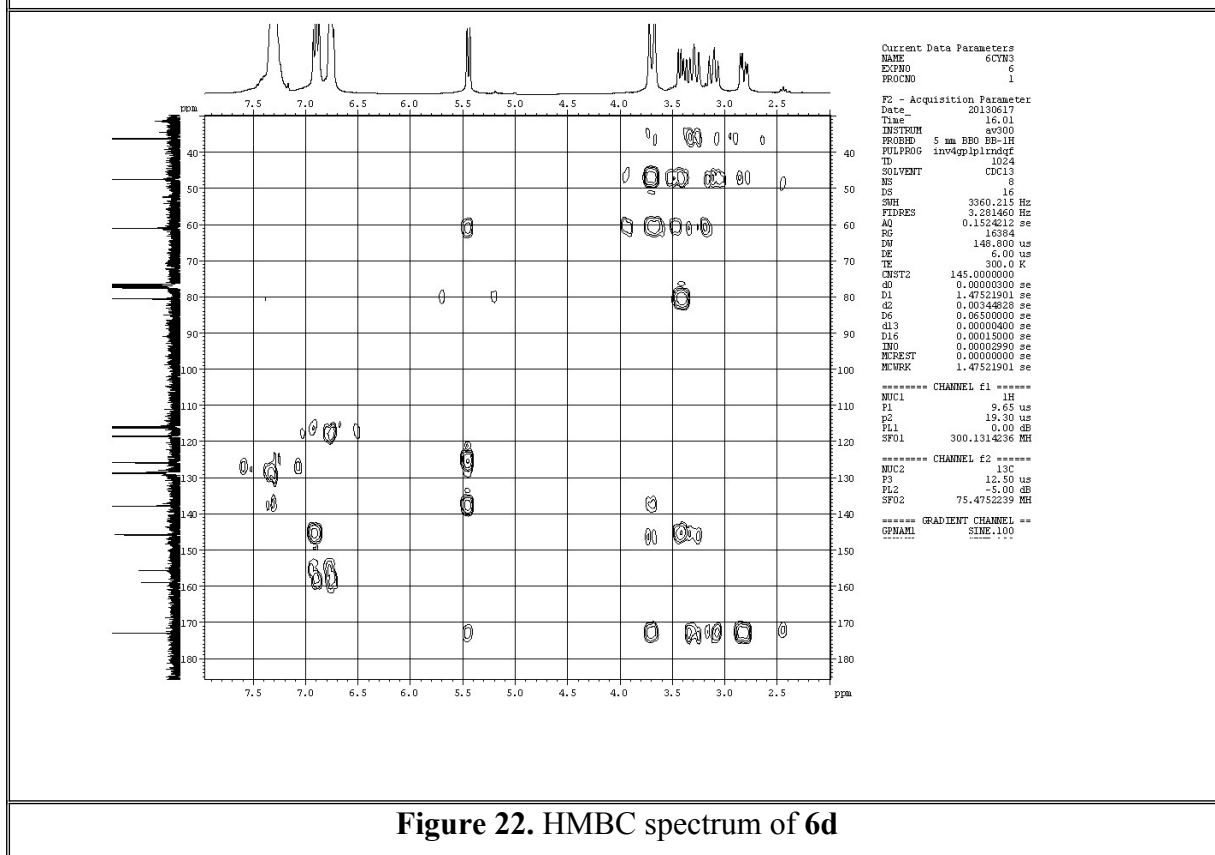

Figure 22. HMBC spectrum of 6d

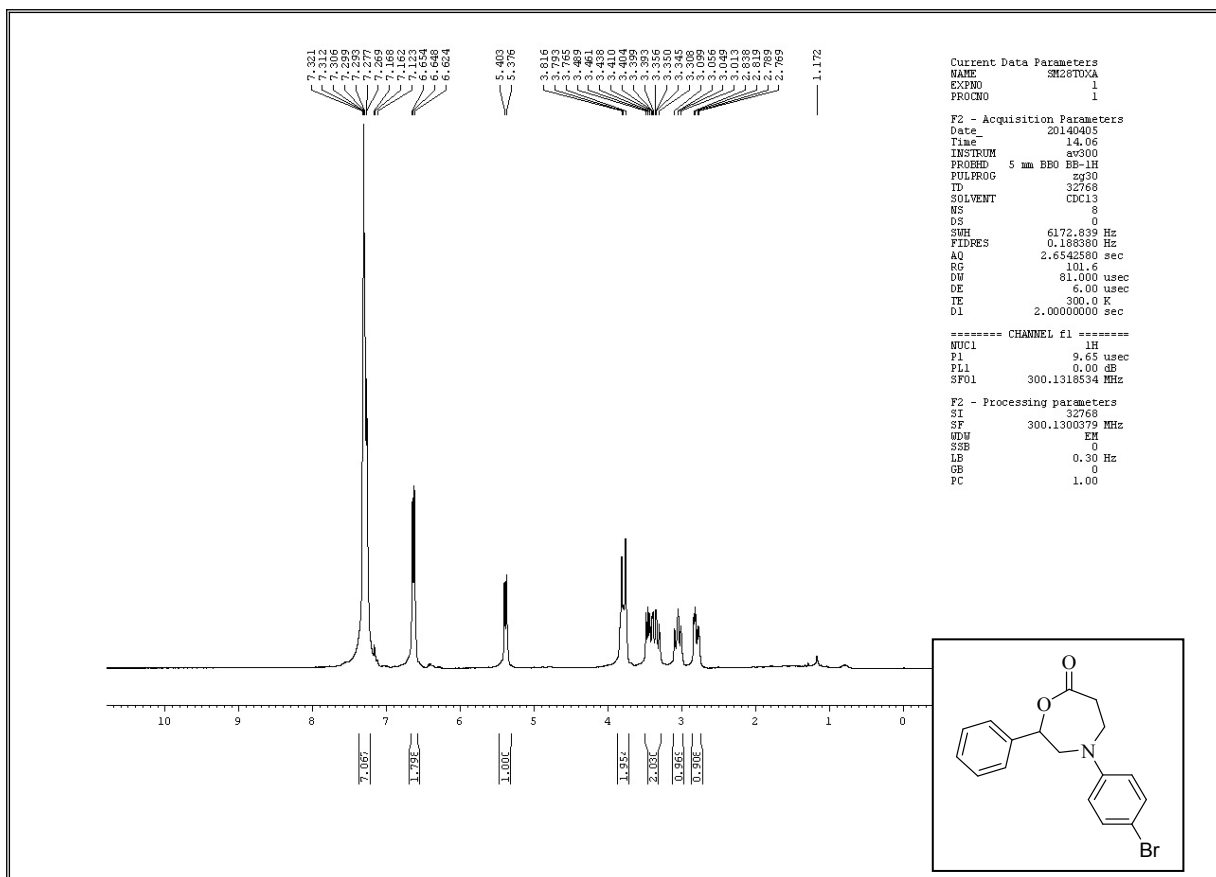

Figure 23. <sup>1</sup>H NMR spectrum of 6e

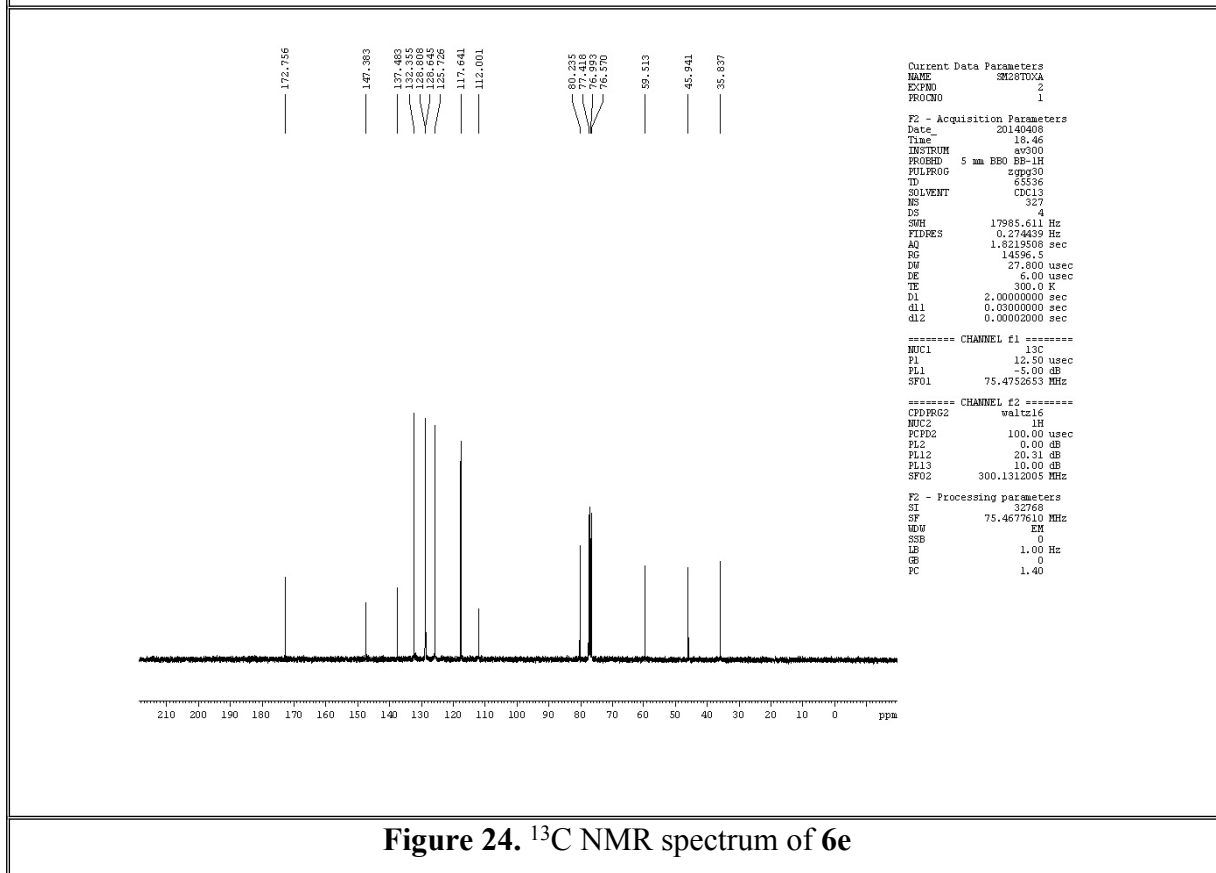

Figure 24. <sup>13</sup>C NMR spectrum of 6e

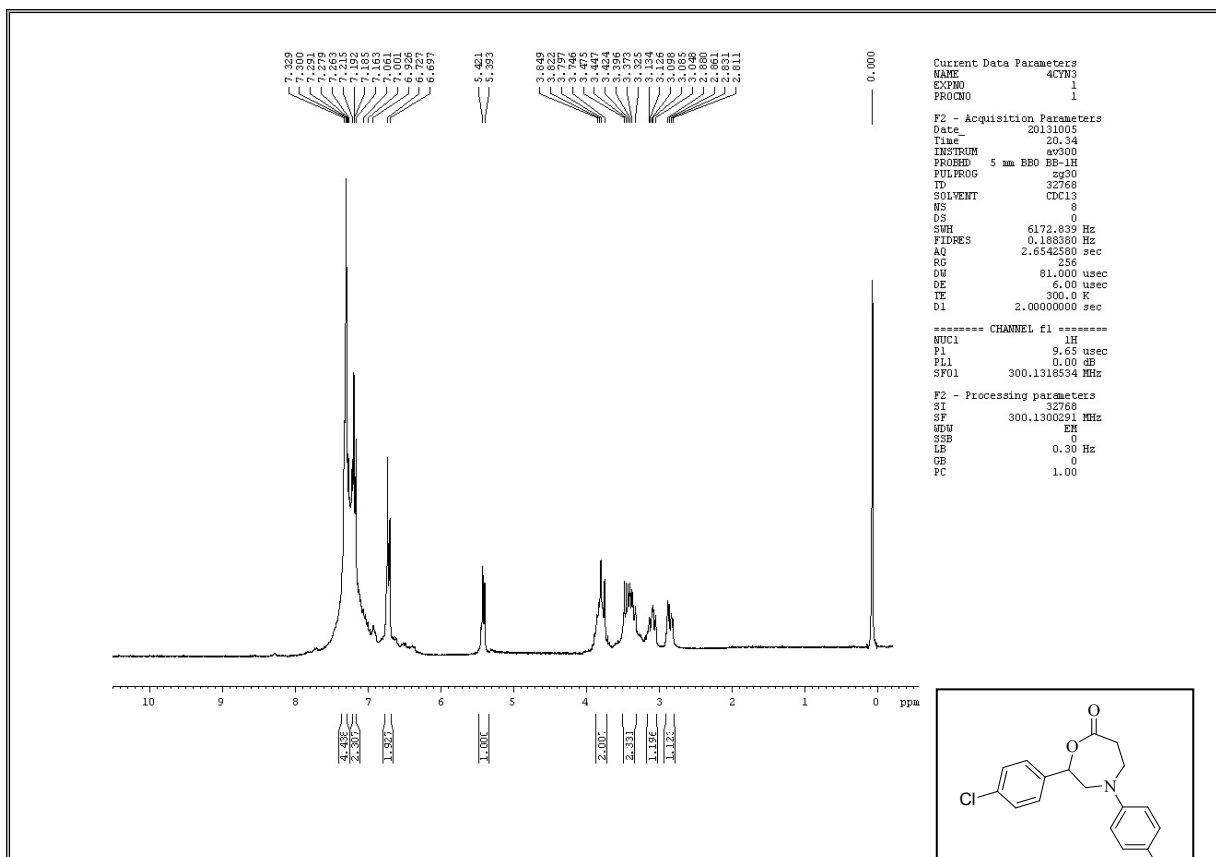

Figure 25. <sup>1</sup>H NMR spectrum of 6f

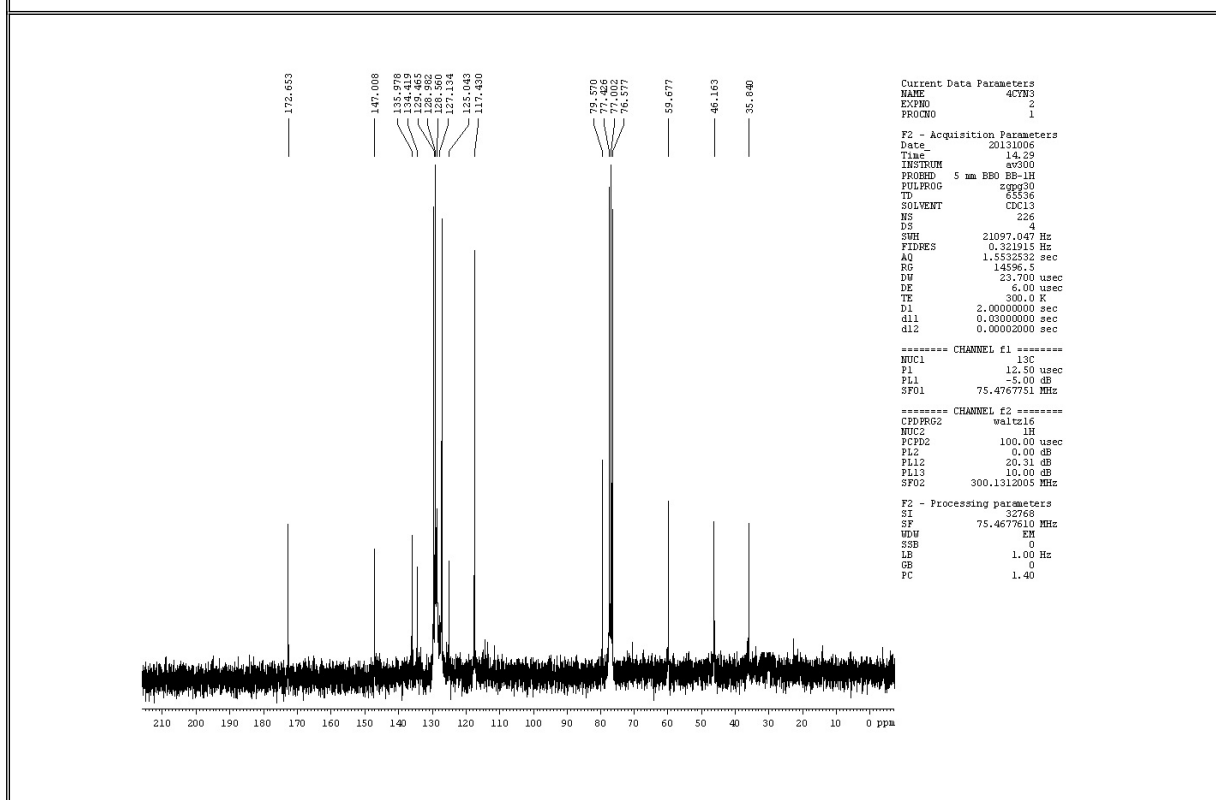

Figure 26. <sup>13</sup>C NMR spectrum of 6f

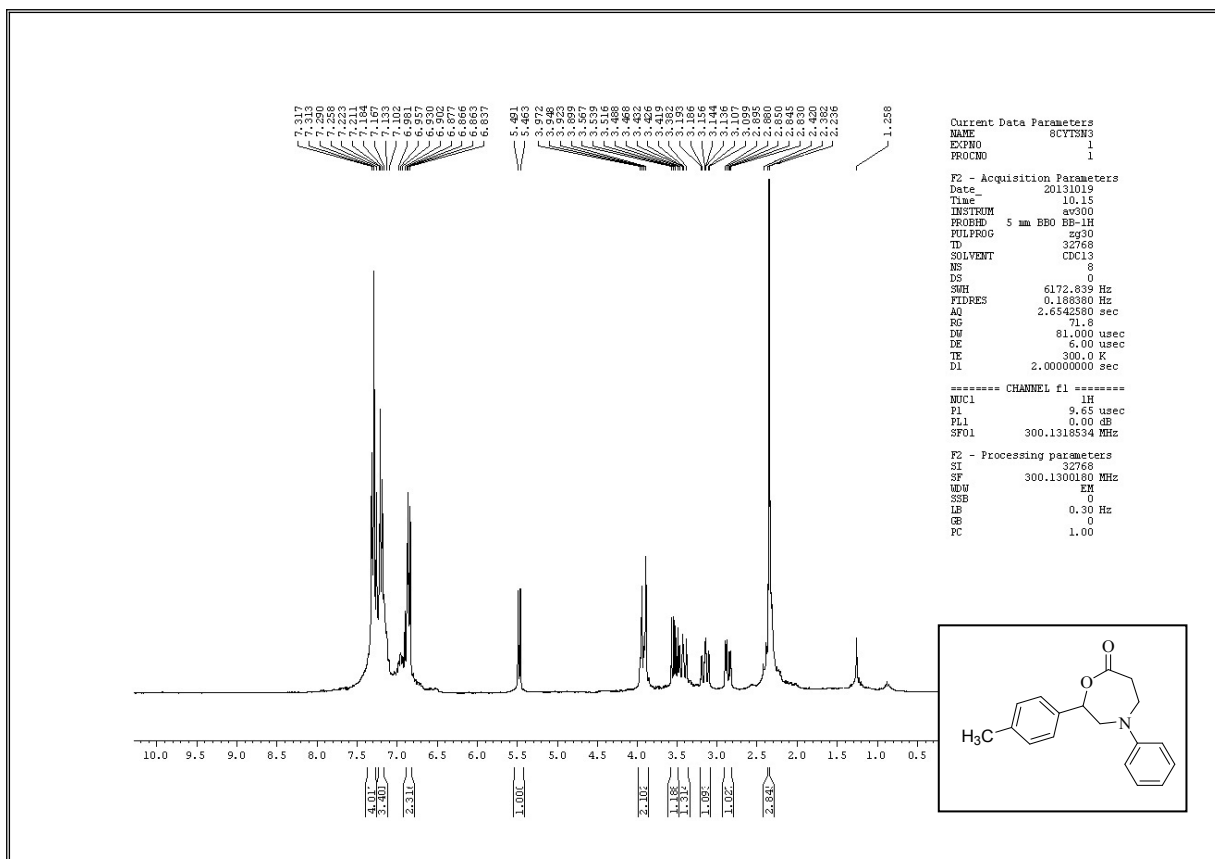

Figure 27.  $^1\text{H}$  NMR spectrum of **6g**

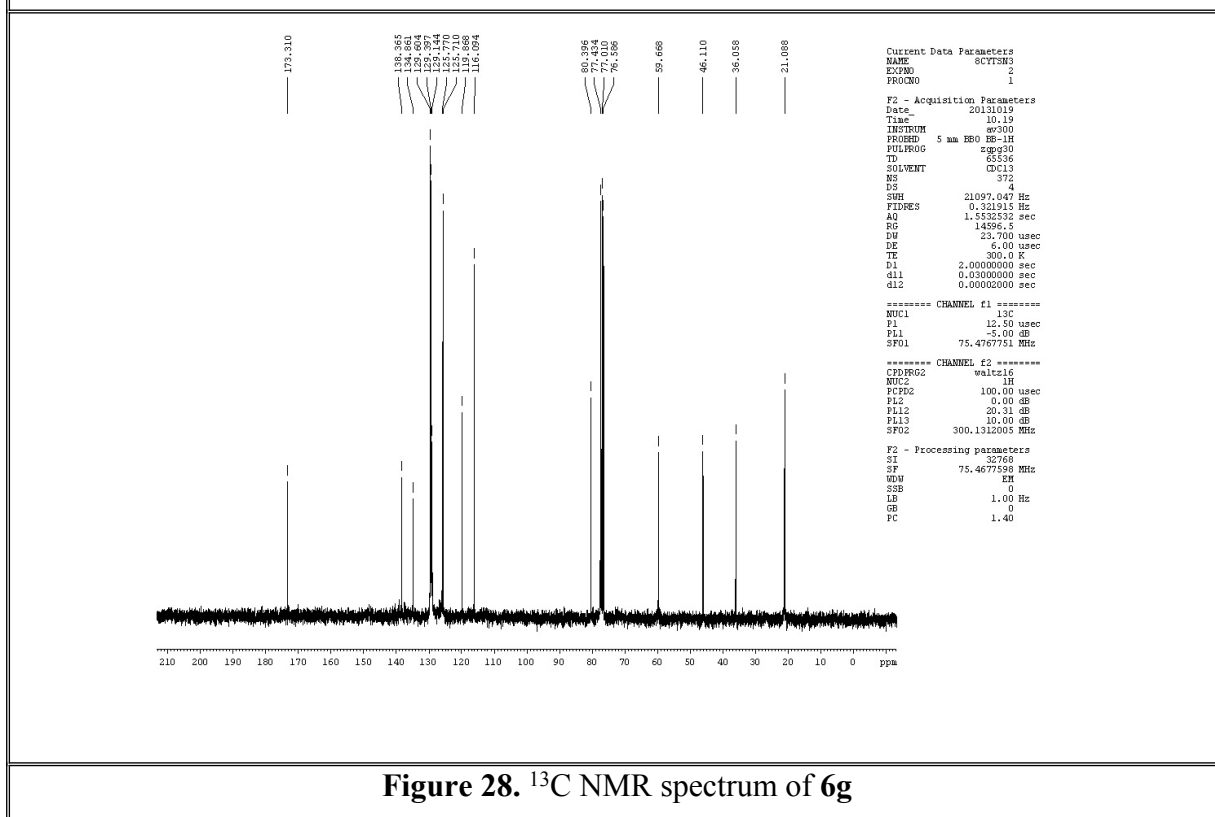

Figure 28.  $^{13}\text{C}$  NMR spectrum of **6g**

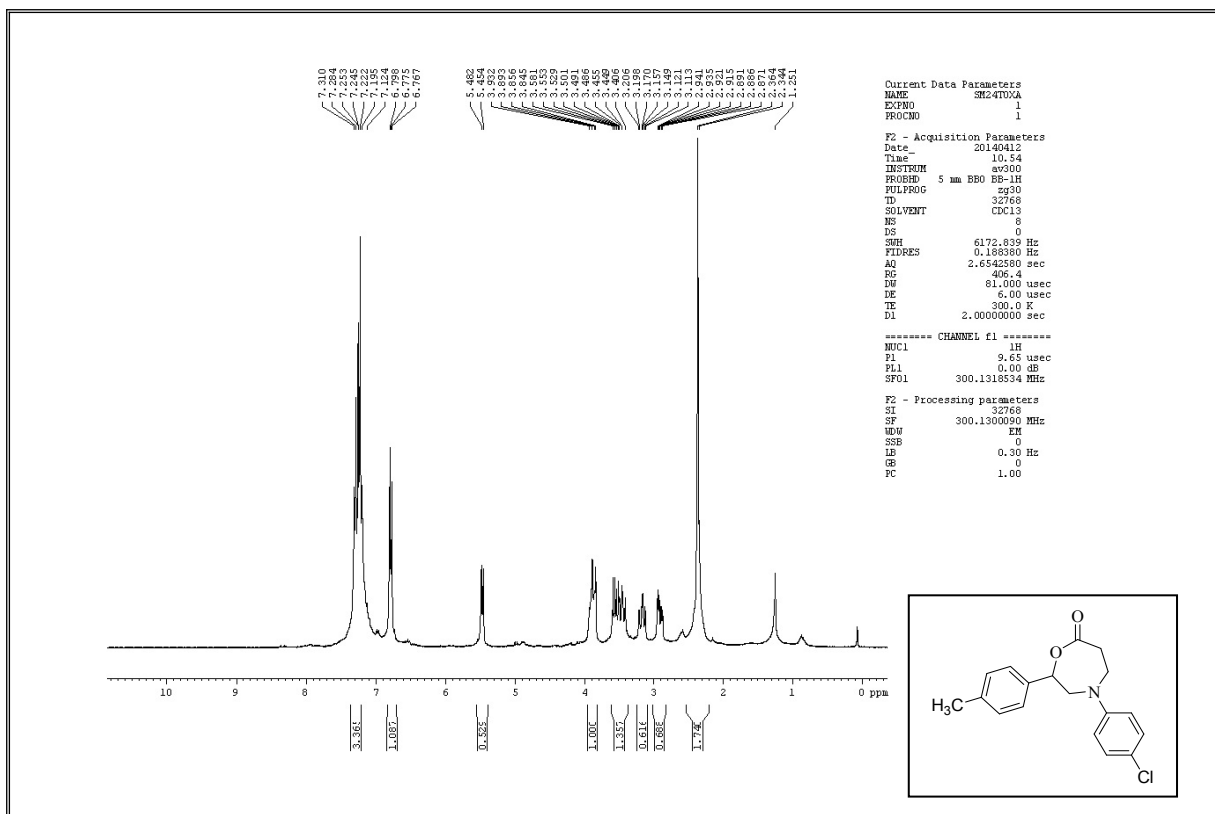

Figure 29. <sup>1</sup>H NMR spectrum of 6h

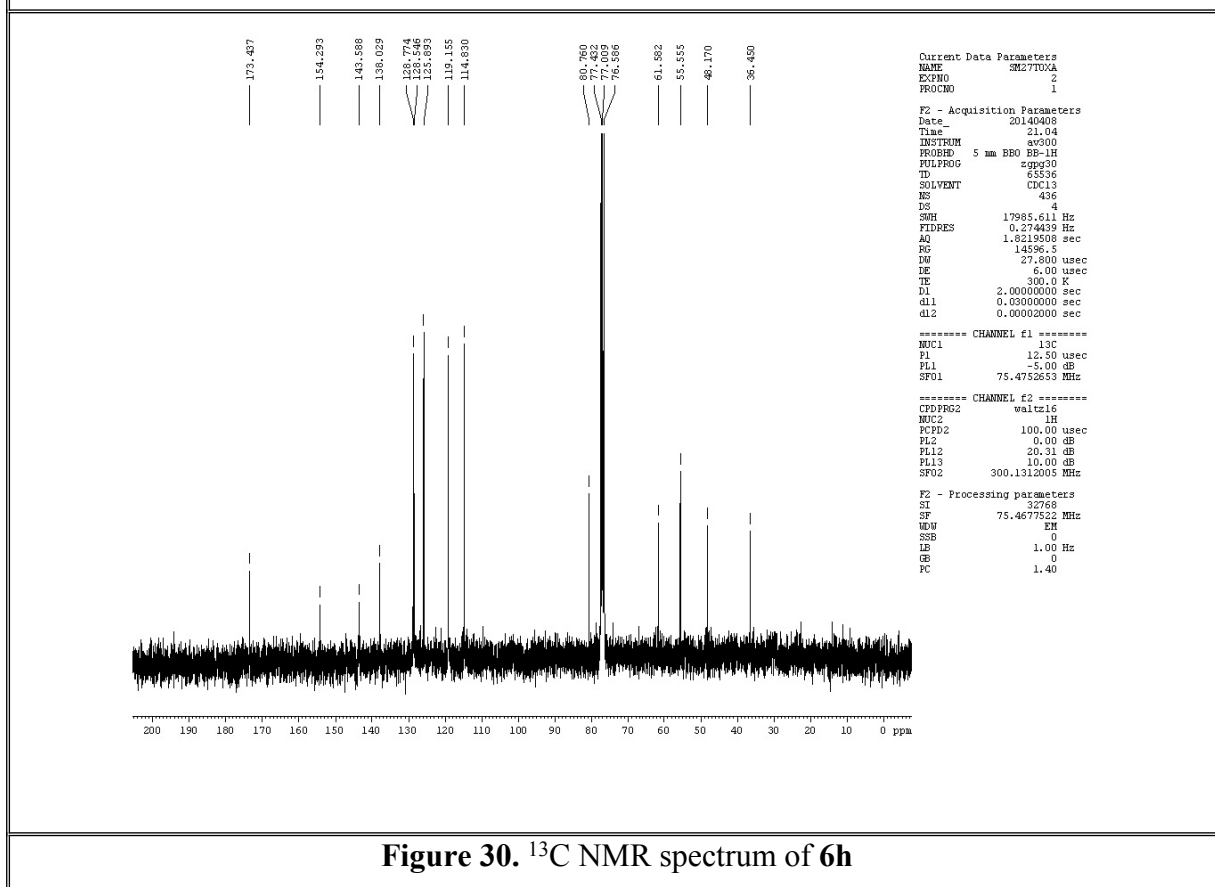

Figure 30. <sup>13</sup>C NMR spectrum of 6h

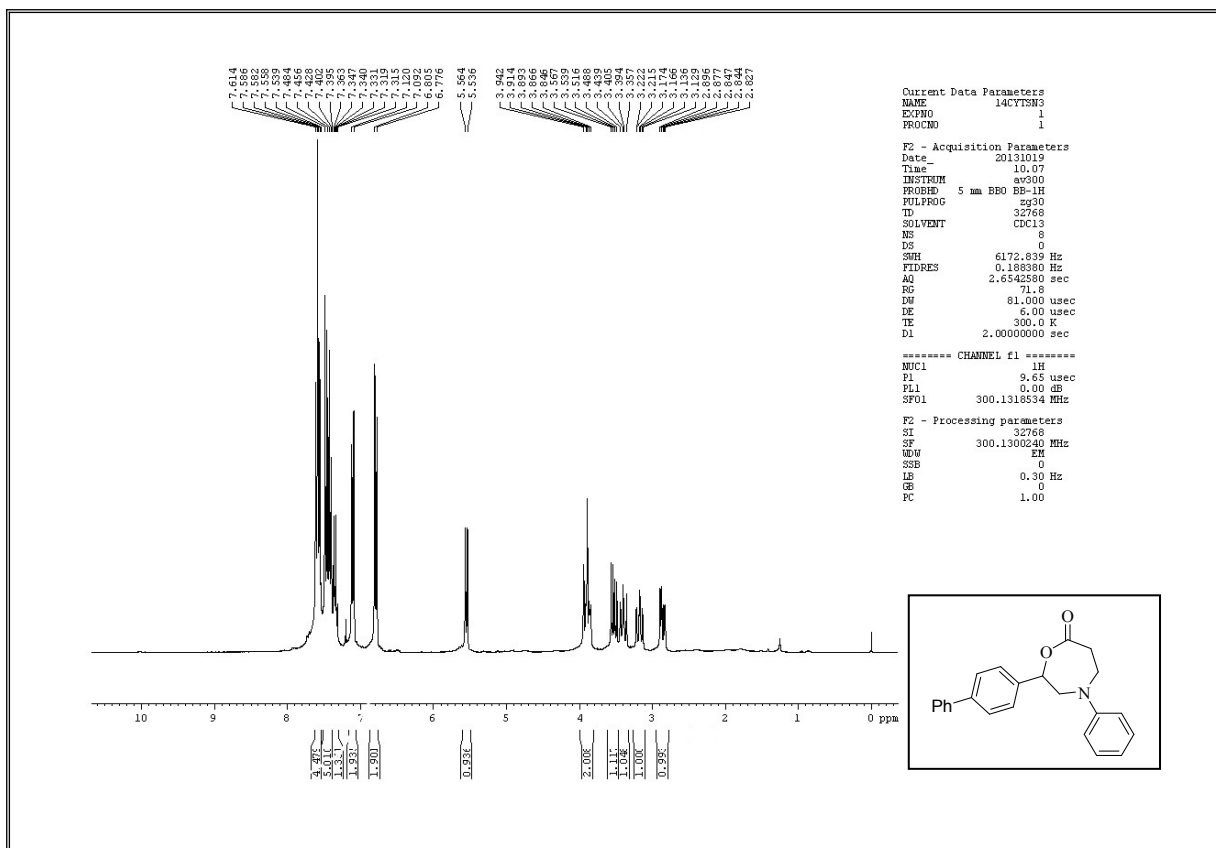

Figure 31. <sup>1</sup>H NMR spectrum of **6i**

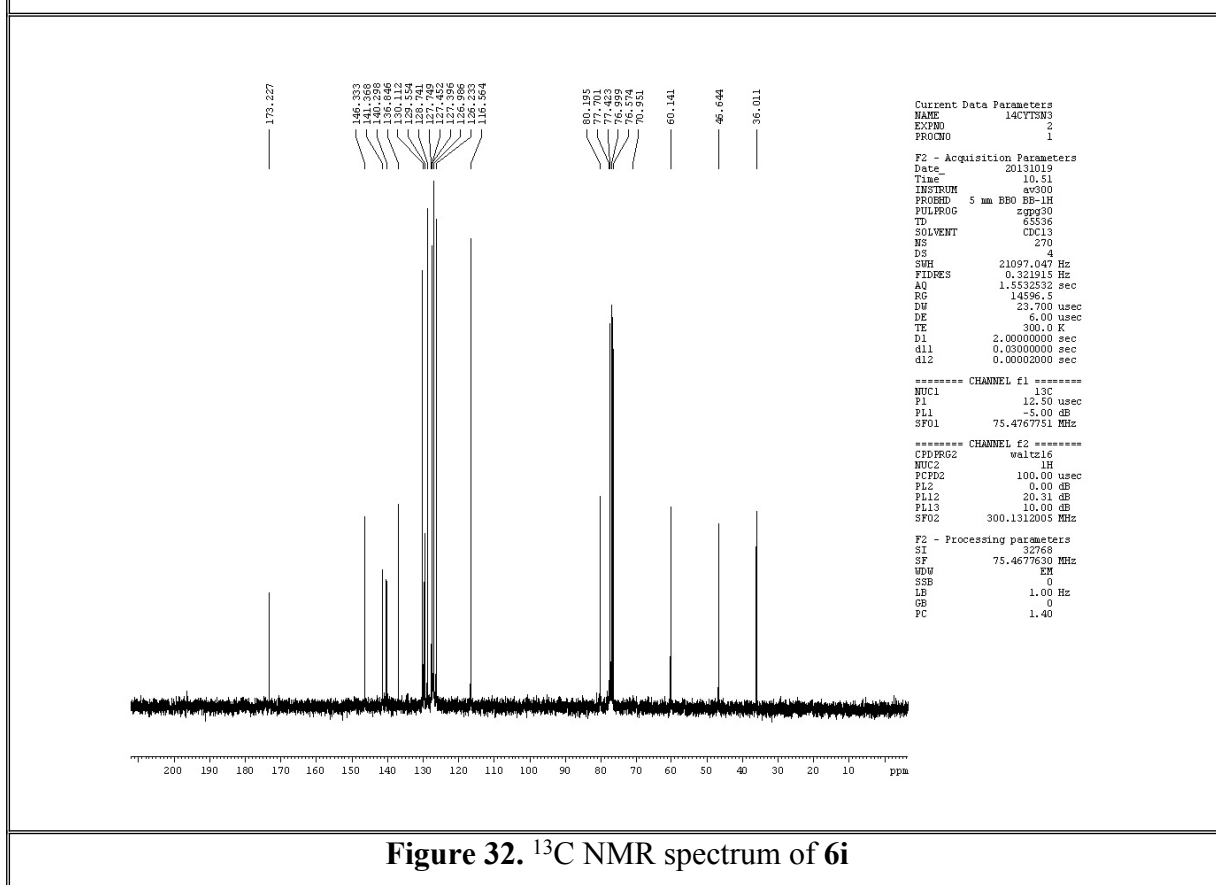

Figure 32. <sup>13</sup>C NMR spectrum of **6i**





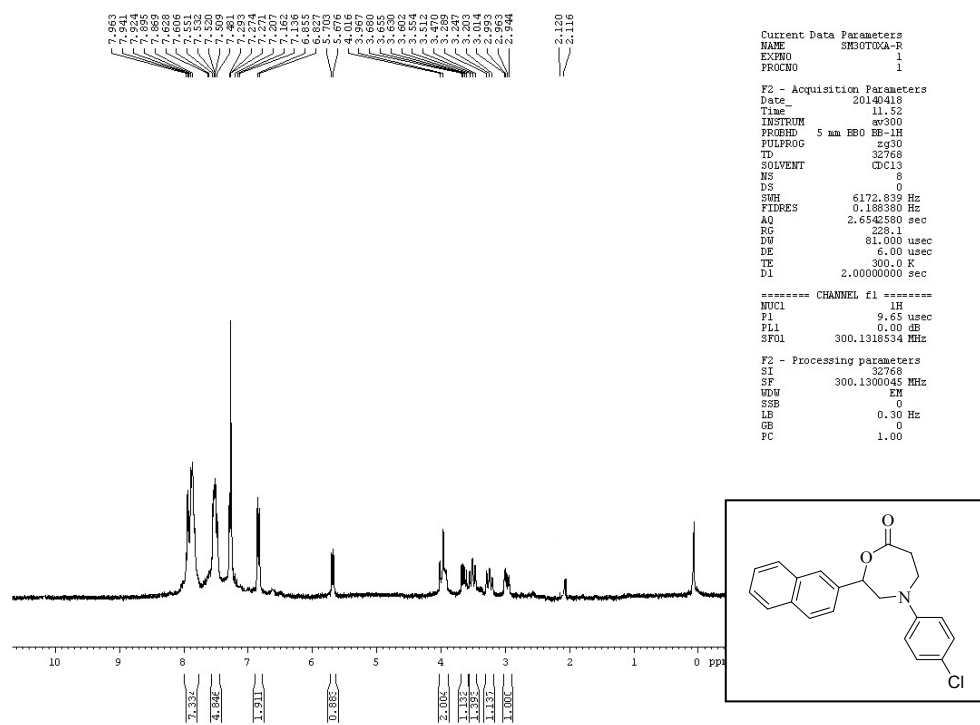

Figure 35.  $^1\text{H}$  NMR spectrum of 6k

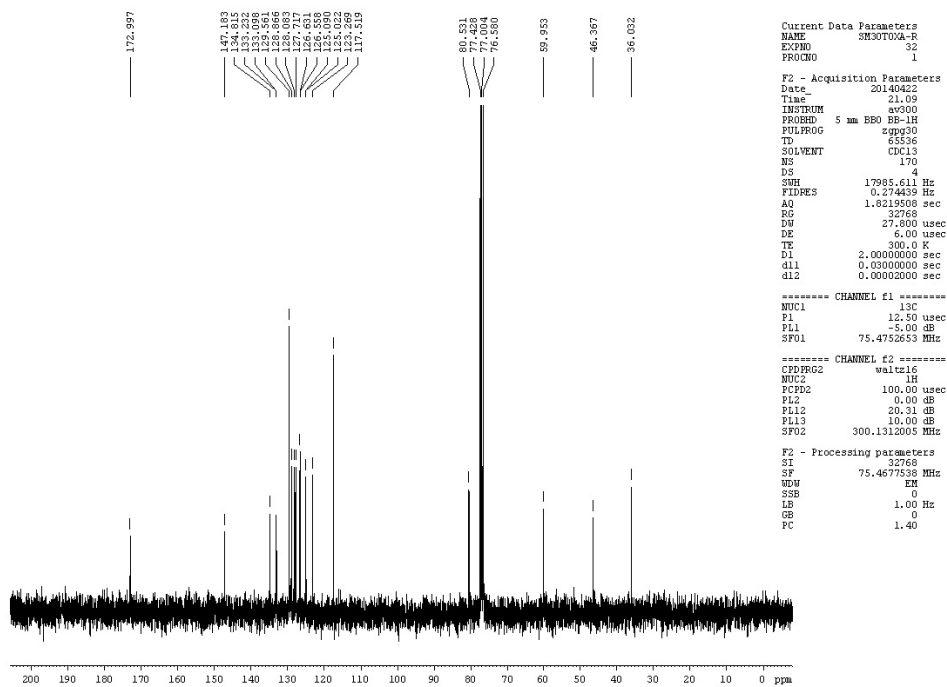

Figure 36.  $^{13}\text{C}$  NMR spectrum of 6k

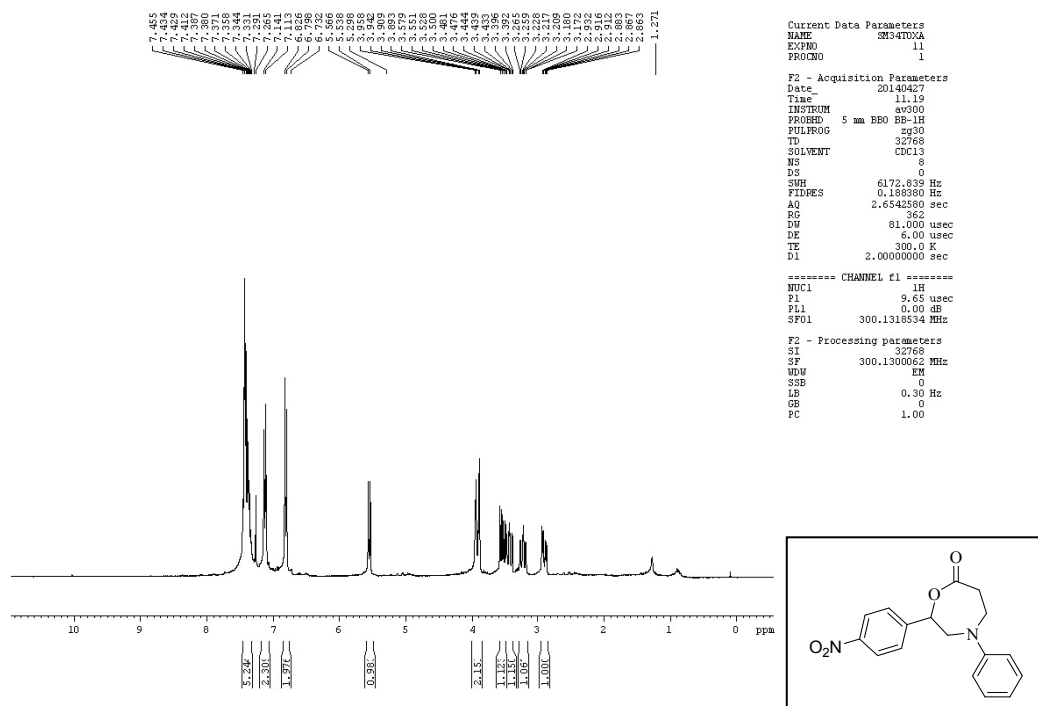

Figure 37. <sup>1</sup>H NMR spectrum of 61

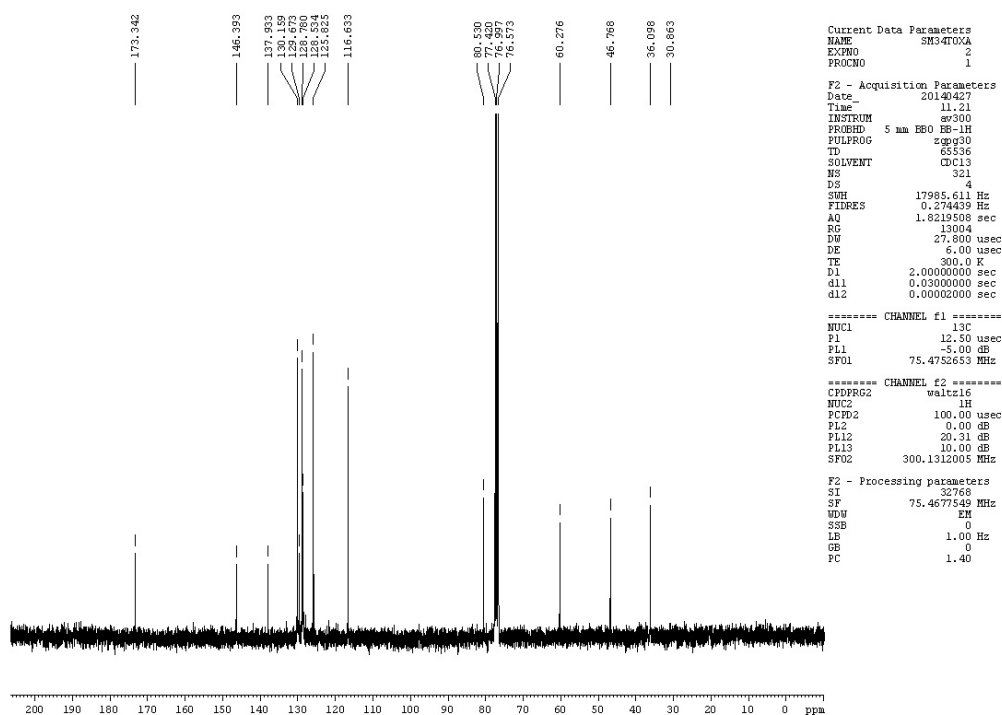

Figure 38. <sup>13</sup>C NMR spectrum of 61
